# Supplementary material
Source: publisher figshare collection journal article supplement (https://geolsoc.figshare.com/ndownloader/files/7448419)
Supplement: Supplementary file 1 [file 7448419]

Table S4b: U/Pb data for analyses by  SHRIMP,,,,,,,,,,,,,,,,,,,,,,,,,,,,,,,,,,,,,,
,,,,,,,,,,,,,,,,,,,,,,,,,,,,,,,,,,,,,,
,,,,,,,,,,,,,,,,,,,,,,,,,,,,,,,,,,,,,,
 Spot,"%
206Pbc","ppm
U","ppm
Th","232Th
/238U","ppm
206Pb*","(1)
206Pb
/238U
Age",,"(2)
206Pb
/238U
Age",,"(3)
206Pb
/238U
Age",,"(1)
207Pb
/206Pb
Age",,"(1)
208Pb
/232Th
Age",,"%
Dis-
cor-
dant","Total
238U
/206Pb",±%,"Total
207Pb
/206Pb",±%,"(1)
238U/
206Pb*",±%,"(1)
207Pb*
/206Pb*",±%,"(1)
207Pb*
/235U",±%,"(1)
206Pb*
/238U",±%,"err
corr","(3)
238U/
206Pb*",±%,"(3)
207Pb*
/206Pb*",±%,"(3)
207Pb*
/235U",±%,"(3)
206Pb*
/238U",±%,"err
corr"
09JAA-0002-1 ,0.81,319,336,1.09,124  ,"2,386.8",± 9.9,"2,334  ",±12  ,"2,416  ",±11  ,"2,589  ",±11  ,"2,152",± 26,8 ,2.213 ,0.49,0.18046,0.45,2.232 ,0.49,0.1732 ,0.66,10.701,0.83,0.4481,0.49,.599,2.199 ,0.49,0.18485,0.44,11.589, 0.65,0.4547,0.49,.743
09JAA-0002-2 ,0.29,244,370,1.56,103  ,"2,560  ",±12  ,"2,541  ",±16  ,"2,558  ",±18  ,"2,618  ",±11  ,"2,570",± 47,2 ,2.046 ,0.59,0.17893,0.55,2.052 ,0.59,0.1763 ,0.65,11.85 ,0.88,0.4874,0.59,.675,2.054 ,0.59,0.17625,0.56,11.834, 0.81,0.4870,0.59,.726
09JAA-0002-3 ,5.18,231,296,1.32,102  ,"2,567  ",±21  ,"2,557  ",±25  ,"2,561  ",±26  ,"2,597  ",±46  ,"2,606",±110,1 ,1.939 ,0.87,0.2203 ,0.74,2.045 ,1.0 ,0.1740 ,2.7 ,11.74 ,2.9 ,0.4891,1.0 ,.343,2.051 ,0.87,0.1831 ,0.99,12.31 , 1.3 ,0.4877,0.87,.659
09JAA-0002-4 ,0.16,770,295,0.40,337  ,"2,652.5",± 7.3,"2,675  ",±10  ,"2,655.0",± 7.6,"2,588.1",± 5.3,"2,592",± 21,-2 ,1.9613,0.33,0.17456,0.29,1.9645,0.33,0.17312,0.32,12.151,0.46,0.5090,0.33,.724,1.9623,0.33,0.17423,0.29,12.242, 0.45,0.5096,0.33,.750
09JAA-0002-5 ,1.51,760,554,0.75,273  ,"2,225.9",± 6.7,"2,172.6",± 7.7,"2,270.0",± 7.4,"2,472  ",±13  ,"1,706",± 39,10 ,2.3883,0.34,0.17494,0.41,2.4248,0.36,0.1615 ,0.77, 9.184,0.85,0.4124,0.36,.422,2.3691,0.34,0.18048,0.40,10.504, 0.53,0.4221,0.34,.648
09JAA-0002-6 ,1.42,150,277,1.91, 65.3,"2,620  ",±17  ,"2,626  ",±21  ,"2,628  ",±21  ,"2,603  ",±30  ,"2,585",± 47,-1 ,1.966 ,0.72,0.1873 ,0.65,1.994 ,0.79,0.1747 ,1.8 ,12.08 ,2.0 ,0.5014,0.79,.400,1.987 ,0.72,0.1802 ,0.68,12.51 ,10   ,0.5033,0.72,.727
09JAA-0002-7 ,0.49,156,143,0.95, 65.8,"2,569  ",±17  ,"2,552  ",±23  ,"2,572  ",±20  ,"2,622  ",±14  ,"2,542",± 47,2 ,2.032 ,0.82,0.1811 ,0.66,2.042 ,0.82,0.1767 ,0.83,11.93 ,1.2 ,0.4896,0.82,.704,2.040 ,0.82,0.1787 ,0.67,12.08 , 1.1 ,0.4903,0.82,.771
09JAA-0002-8 ,0.08,309,303,1.01,124  ,"2,473  ",±11  ,"2,429  ",±15  ,"2,485  ",±13  ,"2,626  ",±16  ,"2,370",± 19,6 ,2.136 ,0.54,0.1778 ,0.93,2.138 ,0.54,0.1771 ,0.95,11.42 ,1.1 ,0.4677,0.54,.498,2.126 ,0.54,0.1812 ,0.91,11.75 , 1.1 ,0.4704,0.54,.512
09JAA-0002-9 ,0.73,484,276,0.59,188  ,"2,393.1",± 9.9,"2,341  ",±12  ,"2,402  ",±11  ,"2,590  ",±11  ,"2,260",± 50,8 ,2.208 ,0.49,0.17983,0.50,2.225 ,0.50,0.1733 ,0.66,10.744,0.83,0.4495,0.50,.598,2.215 ,0.49,0.17775,0.51,11.064, 0.71,0.4514,0.49,.692
09JAA-0002-10 ,0.18,314,303,1.00,135,"2,619",±39,"2,620",±53,"2,619",±44,"2,616.3",±6.6,"2,619",±50,0 ,1.991,1.8,0.17765,0.36,1.995,1.8,0.17608,0.39,12.17,1.9,0.5013,1.8,.978,1.995,1.8,0.17646,0.36,12.20,1.9,0.5013,1.8,.981
09JAA-0002-11 ,0.08,778,1520,2.02,332,"2,599",±39,"2,591",±51,"2,614",±50,"2,622.5",±3.8,"2,540",±49,1 ,2.012,1.8,0.17743,0.22,2.014,1.8,0.17673,0.23,12.10,1.8,0.4966,1.8,.992,2.000,1.8,0.18169,0.22,12.53,1.8,0.5001,1.8,.993
09JAA-0002-12 ,0.34,1698,1501,0.91,692,"2,494",±37,"2,485",±48,"2,496",±42,"2,526.1",±3.6,"2,479",±46,1 ,2.110,1.8,0.16982,0.16,2.117,1.8,0.16683,0.21,10.87,1.8,0.4724,1.8,.993,2.115,1.8,0.16800,0.16,10.95,1.8,0.4727,1.8,.996
"   Errors are 1-sigma; Pbc and Pb* indicate the common and radiogenic portions, respectively.",,,,,,,,,,,,,,,,,,,,,,,,,,,,,,,,,,,,,,
   Error in Standard calibration was 0.24%( not included in above errors but required when comparing data from different mounts).,,,,,,,,,,,,,,,,,,,,,,,,,,,,,,,,,,,,,,
   (1) Common Pb corrected using measured 204Pb.,,,,,,,,,,,,,,,,,,,,,,,,,,,,,,,,,,,,,,
   (2) Common Pb corrected by assuming 206Pb/238U-207Pb/235U age-concordance,,,,,,,,,,,,,,,,,,,,,,,,,,,,,,,,,,,,,,
   (3) Common Pb corrected by assuming 206Pb/238U-208Pb/232Th age-concordance,,,,,,,,,,,,,,,,,,,,,,,,,,,,,,,,,,,,,,
,,,,,,,,,,,,,,,,,,,,,,,,,,,,,,,,,,,,,,
,,,,,,,,,,,,,,,,,,,,,,,,,,,,,,,,,,,,,,
,,,,,,,,,,,,,,,,,,,,,,,,,,,,,,,,,,,,,,
 Spot,"%
206Pbc","ppm
U","ppm
Th","232Th
/238U","ppm
206Pb*","(1)
206Pb
/238U
Age",,"(2)
206Pb
/238U
Age",,"(3)
206Pb
/238U
Age",,"(1)
207Pb
/206Pb
Age",,"(1)
208Pb
/232Th
Age",,"%
Dis-
cor-
dant","Total
238U
/206Pb",±%,"Total
207Pb
/206Pb",±%,"(1)
238U/
206Pb*",±%,"(1)
207Pb*
/206Pb*",±%,"(1)
207Pb*
/235U",±%,"(1)
206Pb*
/238U",±%,"err
corr","(3)
238U/
206Pb*",±%,"(3)
207Pb*
/206Pb*",±%,"(3)
207Pb*
/235U",±%,"(3)
206Pb*
/238U",±%,"err
corr"
09JAA-0007-1 ,0.34,68,46,0.70, 29.7,"2,646",±22,"2,631",±30,"2,649",±24,"2,687  ",±17  ,"2,606",± 51,2 ,1.964,1.0 ,0.1868 ,0.94,1.971,1.0 ,0.1837 ,1.0 ,12.85 ,1.5 ,0.5074,1.0 ,.700,1.968,1.0 ,0.1854 ,0.95,12.99 ,1.4 ,0.5081,1.0 ,.733
09JAA-0007-2 ,0.45,72,32,0.45, 31.9,"2,654",±22,"2,643",±29,"2,659",±23,"2,686  ",±18  ,"2,551",± 78,1 ,1.954,0.98,0.1877 ,0.90,1.963,0.99,0.1837 ,1.1 ,12.90 ,1.5 ,0.5095,0.99,.675,1.958,0.98,0.1861 ,0.91,13.10 ,1.3 ,0.5106,0.98,.734
09JAA-0007-3 ,0.29,199,163,0.85, 80.6,"2,480",±13,"2,437",±16,"2,477",±14,"2,627  ",±11  ,"2,508",± 27,6 ,2.125,0.60,0.1798 ,0.57,2.131,0.61,0.1772 ,0.65,11.47 ,0.89,0.4692,0.61,.680,2.134,0.60,0.1770 ,0.58,11.433,0.84,0.4686,0.60,.719
09JAA-0007-4 ,0.18,235,266,1.17,100.0,"2,598",±12,"2,578",±16,"2,607",±14,"2,658.9",± 9.4,"2,536",± 22,2 ,2.011,0.57,0.18227,0.52,2.014,0.57,0.1807 ,0.57,12.366,0.80,0.4964,0.57,.708,2.007,0.57,0.18366,0.52,12.619,0.77,0.4983,0.57,.736
09JAA-0007-5C ,0.31,210,143,0.70, 82.2,"2,414",±12,"2,344",±15,"2,408",±13,"2,667  ",±11  ,"2,486",± 31,9 ,2.195,0.60,0.1842 ,0.58,2.202,0.60,0.1815 ,0.68,11.36 ,0.91,0.4541,0.60,.665,2.208,0.60,0.1803 ,0.60,11.255,0.85,0.4529,0.60,.707
09JAA-0007-6 ,0.22,284,136,0.49, 97.0,"2,153",±10,"2,068",±12,"2,146",±11,"2,568  ",±10  ,"2,284",± 28,16 ,2.516,0.55,0.17301,0.55,2.522,0.55,0.1710 ,0.62, 9.352,0.83,0.3965,0.55,.666,2.532,0.55,0.16875,0.57, 9.190,0.79,0.3950,0.55,.691
09JAA-0007-7 ,0.21,319,241,0.78,131  ,"2,510",±17,"2,470",±22,"2,523",±19,"2,639.5",± 8.4,"2,356",± 41,5 ,2.096,0.84,0.18046,0.44,2.101,0.84,0.17856,0.51,11.72 ,0.98,0.4760,0.84,.855,2.088,0.84,0.18328,0.43,12.10 ,0.94,0.4790,0.84,.889
09JAA-0007-8 ,0.17,252,135,0.56,110  ,"2,640",±12,"2,636",±16,"2,645",±12,"2,653.5",± 8.9,"2,563",± 28,0 ,1.972,0.54,0.18161,0.49,1.976,0.54,0.18007,0.54,12.567,0.76,0.5062,0.54,.711,1.972,0.54,0.18185,0.49,12.718,0.73,0.5072,0.54,.739
09JAA-0007-9C ,0.24,228,152,0.69, 98.3,"2,612",±13,"2,600",±17,"2,615",±14,"2,648  ",±10  ,"2,583",± 31,1 ,1.997,0.59,0.1816 ,0.55,2.001,0.59,0.1795 ,0.63,12.37 ,0.86,0.4997,0.59,.684,1.999,0.59,0.1807 ,0.56,12.46 ,0.81,0.5002,0.59,.726
09JAA-0007-10 ,0.13,332,213,0.66,142  ,"2,605",±11,"2,594",±14,"2,610",±12,"2,637.3",± 8.7,"2,536",± 26,1 ,2.006,0.50,0.17950,0.46,2.008,0.50,0.17832,0.53,12.242,0.73,0.4979,0.50,.691,2.004,0.50,0.18016,0.46,12.397,0.68,0.4991,0.50,.737
09JAA-0007-11 ,0.22,307,178,0.60,139  ,"2,717",±13,"2,742",±18,"2,722",±13,"2,652.4",± 8.4,"2,634",± 29,-2 ,1.904,0.57,0.18186,0.46,1.908,0.57,0.17994,0.51,13.005,0.76,0.5242,0.57,.746,1.903,0.57,0.18198,0.46,13.183,0.73,0.5254,0.57,.779
09JAA-0007-12 ,0.16,200,126,0.65, 81.3,"2,492",±13,"2,448",±16,"2,488",±14,"2,639  ",±11  ,"2,550",± 33,6 ,2.116,0.62,0.1799 ,0.58,2.119,0.62,0.1785 ,0.67,11.61 ,0.92,0.4719,0.62,.680,2.123,0.62,0.1775 ,0.60,11.524,0.86,0.4710,0.62,.722
09JAA-0007-13 ,0.24,215,16,0.08, 97.3,"2,725",±15,"2,739",±21,"2,725",±15,"2,689.2",± 9.9,"2,766",±190,-1 ,1.896,0.66,0.18616,0.54,1.901,0.66,0.1840 ,0.60,13.35 ,0.89,0.5261,0.66,.742,1.901,0.66,0.1844 ,0.54,13.38 ,0.85,0.5260,0.66,.773
09JAA-0007-14 ,0.08,339,212,0.65,134,"2,438",±37,"2,379",±45,"2,431",±40,"2,650.0",±6.0,"2,542",±50,8 ,2.174,1.8,0.18043,0.35,2.175,1.8,0.17969,0.36,11.39,1.9,0.4597,1.8,.981,2.183,1.8,0.17739,0.36,11.20,1.9,0.4580,1.8,.982
09JAA-0007-15 ,0.11,312,197,0.65,139,"2,693",±40,"2,703",±56,"2,694",±43,"2,665.8",±6.2,"2,670",±51,-1 ,1.927,1.8,0.18242,0.35,1.929,1.8,0.18141,0.37,12.97,1.9,0.5184,1.8,.980,1.928,1.8,0.18213,0.35,13.03,1.9,0.5188,1.8,.982
09JAA-0007-16 ,0.10,390,189,0.50,141,"2,264",±35,"2,180",±40,"2,253",±37,"2,623.4",±7.5,"2,463",±75,14 ,2.375,1.8,0.17772,0.44,2.377,1.8,0.17683,0.45,10.26,1.9,0.4207,1.8,.971,2.391,1.8,0.17307,0.45, 9.98,1.9,0.4183,1.8,.971
"   Errors are 1-sigma; Pbc and Pb* indicate the common and radiogenic portions, respectively.",,,,,,,,,,,,,,,,,,,,,,,,,,,,,,,,,,,,,,
   Error in Standard calibration was 0.24%( not included in above errors but required when comparing data from different mounts).,,,,,,,,,,,,,,,,,,,,,,,,,,,,,,,,,,,,,,
   (1) Common Pb corrected using measured 204Pb.,,,,,,,,,,,,,,,,,,,,,,,,,,,,,,,,,,,,,,
   (2) Common Pb corrected by assuming 206Pb/238U-207Pb/235U age-concordance,,,,,,,,,,,,,,,,,,,,,,,,,,,,,,,,,,,,,,
   (3) Common Pb corrected by assuming 206Pb/238U-208Pb/232Th age-concordance,,,,,,,,,,,,,,,,,,,,,,,,,,,,,,,,,,,,,,
,,,,,,,,,,,,,,,,,,,,,,,,,,,,,,,,,,,,,,
,,,,,,,,,,,,,,,,,,,,,,,,,,,,,,,,,,,,,,
,,,,,,,,,,,,,,,,,,,,,,,,,,,,,,,,,,,,,,
 Spot,"%
206Pbc","ppm
U","ppm
Th","232Th
/238U","ppm
206Pb*","(1)
206Pb
/238U
Age",,"(2)
206Pb
/238U
Age",,"(3)
206Pb
/238U
Age",,"(1)
207Pb
/206Pb
Age",,"(1)
208Pb
/232Th
Age",,"%
Dis-
cor-
dant","Total
238U
/206Pb",±%,"Total
207Pb
/206Pb",±%,"(1)
238U/
206Pb*",±%,"(1)
207Pb*
/206Pb*",±%,"(1)
207Pb*
/235U",±%,"(1)
206Pb*
/238U",±%,"err
corr","(3)
238U/
206Pb*",±%,"(3)
207Pb*
/206Pb*",±%,"(3)
207Pb*
/235U",±%,"(3)
206Pb*
/238U",±%,"err
corr"
09JAA-0010-1 ,0.25,305,415,1.41,122  ,"2,453",±64,"2,410",±79,"2,469",±76,"2,605  ",±10  ,"2,357",±75,6 ,2.154,3.1,0.17713,0.54,2.159,3.1,0.1749 ,0.61,11.17,3.2,0.463,3.1,.982,2.143,3.1,0.18077,0.53,11.63,3.2,0.467,3.1,.986
09JAA-0010-2 ,0.96,76,80,1.08, 30.3,"2,428",±66,"2,380",±80,"2,426",±75,"2,605  ",±24  ,"2,443",±92,7 ,2.165,3.2,0.1834 ,1.0 ,2.186,3.3,0.1748 ,1.4 ,11.03,3.6,0.457,3.3,.914,2.188,3.2,0.1762 ,1.1 ,11.10,3.4,0.457,3.2,.951
09JAA-0010-3 ,0.83,81,89,1.14, 33.8,"2,536",±68,"2,512",±88,"2,549",±78,"2,614  ",±22  ,"2,433",±90,3 ,2.057,3.2,0.1832 ,0.96,2.074,3.3,0.1758 ,1.3 ,11.69,3.5,0.482,3.3,.925,2.061,3.2,0.1819 ,0.97,12.16,3.4,0.485,3.2,.958
09JAA-0010-4c ,0.56,355,571,1.66,148  ,"2,540",±65,"2,522",±85,"2,542",±81,"2,596  ",±11  ,"2,526",±81,2 ,2.059,3.1,0.17894,0.48,2.071,3.1,0.1739 ,0.68,11.58,3.2,0.483,3.1,.977,2.068,3.1,0.17597,0.49,11.73,3.2,0.483,3.1,.988
09JAA-0010-5 ,0.32,157,247,1.63, 64.2,"2,500",±65,"2,473",±82,"2,516",±79,"2,591  ",±15  ,"2,421",±90,4 ,2.104,3.1,0.1764 ,0.78,2.110,3.1,0.1735 ,0.87,11.33,3.2,0.474,3.1,.963,2.095,3.1,0.1793 ,0.77,11.80,3.2,0.477,3.1,.971
09JAA-0010-6c ,0.14,535,676,1.31,209  ,"2,412",±64,"2,376",±79,"2,424",±75,"2,544.3",± 5.7,"2,332",±82,5 ,2.201,3.2,0.16987,0.32,2.204,3.2,0.16865,0.34,10.55,3.2,0.454,3.2,.994,2.191,3.2,0.17317,0.31,10.90,3.2,0.456,3.2,.995
09JAA-0010-7 ,0.70,118,138,1.21, 50.4,"2,584",±67,"2,580",±88,"2,592",±77,"2,597  ",±14  ,"2,529",±88,0 ,2.013,3.1,0.1803 ,0.64,2.028,3.1,0.1741 ,0.86,11.84,3.3,0.493,3.1,.964,2.020,3.1,0.1779 ,0.65,12.14,3.2,0.495,3.1,.979
09JAA-0010-8 ,0.26,254,238,0.97,108  ,"2,594",±67,"2,582",±89,"2,600",±75,"2,629.7",± 8.9,"2,538",±94,1 ,2.014,3.2,0.17981,0.47,2.019,3.2,0.17750,0.53,12.12,3.2,0.495,3.2,.986,2.013,3.2,0.17993,0.47,12.32,3.2,0.497,3.2,.989
09JAA-0010-9 ,0.54,131,142,1.12, 58.1,"2,666",±69,"2,681",±95,"2,676",±78,"2,624  ",±13  ,"2,580",±85,-2 ,1.942,3.1,0.1817 ,0.62,1.953,3.1,0.1769 ,0.79,12.49,3.2,0.512,3.1,.970,1.943,3.1,0.1813 ,0.62,12.87,3.2,0.515,3.1,.981
09JAA-0010-10c ,0.88,138,158,1.18, 57.1,"2,507",±65,"2,480",±83,"2,492",±76,"2,598  ",±27  ,"2,619",±89,4 ,2.085,3.1,0.1820 ,1.4 ,2.104,3.1,0.1742 ,1.6 ,11.42,3.5,0.475,3.1,.890,2.119,3.1,0.1709 ,1.5 ,11.12,3.5,0.472,3.1,.901
"   Errors are 1-sigma; Pbc and Pb* indicate the common and radiogenic portions, respectively.",,,,,,,,,,,,,,,,,,,,,,,,,,,,,,,,,,,,,,
   Error in Standard calibration was 0.79%( not included in above errors but required when comparing data from different mounts).,,,,,,,,,,,,,,,,,,,,,,,,,,,,,,,,,,,,,,
   (1) Common Pb corrected using measured 204Pb.,,,,,,,,,,,,,,,,,,,,,,,,,,,,,,,,,,,,,,
   (2) Common Pb corrected by assuming 206Pb/238U-207Pb/235U age-concordance,,,,,,,,,,,,,,,,,,,,,,,,,,,,,,,,,,,,,,
   (3) Common Pb corrected by assuming 206Pb/238U-208Pb/232Th age-concordance,,,,,,,,,,,,,,,,,,,,,,,,,,,,,,,,,,,,,,
,,,,,,,,,,,,,,,,,,,,,,,,,,,,,,,,,,,,,,
,,,,,,,,,,,,,,,,,,,,,,,,,,,,,,,,,,,,,,
,,,,,,,,,,,,,,,,,,,,,,,,,,,,,,,,,,,,,,
 Spot,"%
206Pbc","ppm
U","ppm
Th","232Th
/238U","ppm
206Pb*","(1)
206Pb
/238U
Age",,"(2)
206Pb
/238U
Age",,"(3)
206Pb
/238U
Age",,"(1)
207Pb
/206Pb
Age",,"(1)
208Pb
/232Th
Age",,"%
Dis-
cor-
dant","Total
238U
/206Pb",±%,"Total
207Pb
/206Pb",±%,"(1)
238U/
206Pb*",±%,"(1)
207Pb*
/206Pb*",±%,"(1)
207Pb*
/235U",±%,"(1)
206Pb*
/238U",±%,"err
corr","(3)
238U/
206Pb*",±%,"(3)
207Pb*
/206Pb*",±%,"(3)
207Pb*
/235U",±%,"(3)
206Pb*
/238U",±%,"err
corr"
09JAA-0011-1 ,0.42,209,185,0.92, 88.4,"2,578  ",±12  ,"2,559  ",±16  ,"2,584  ",±13  ,"2,636  ",±11  ,"2,519",±28,2 ,2.025 ,0.55,0.18194,0.52,2.034 ,0.56,0.1782 ,0.65,12.08 ,0.86,0.4917,0.56,.648,2.028 ,0.55,0.18097,0.52,12.303,0.76,0.4931,0.55,.728
09JAA-0011-2 ,0.09,237,176,0.77,101  ,"2,590  ",±11  ,"2,573  ",±15  ,"2,597  ",±12  ,"2,640.9",± 8.2,"2,502",±21,2 ,2.021 ,0.52,0.17954,0.47,2.023 ,0.52,0.17871,0.49,12.182,0.72,0.4944,0.52,.723,2.016 ,0.52,0.18122,0.47,12.395,0.70,0.4961,0.52,.743
09JAA-0011-3 ,0.19,784,222,0.29,288  ,"2,292.8",± 6.5,"2,222.1",± 7.7,"2,285.6",± 6.8,"2,590.1",± 5.1,"2,524",±25,11 ,2.3367,0.34,0.17503,0.27,2.3411,0.34,0.17333,0.31,10.208,0.46,0.4271,0.34,.741,2.3500,0.34,0.17111,0.28,10.039,0.44,0.4255,0.34,.764
09JAA-0011-4C ,0.23,248,203,0.84,107  ,"2,624  ",±12  ,"2,614  ",±16  ,"2,621  ",±13  ,"2,652.7",± 9.4,"2,662",±26,1 ,1.986 ,0.54,0.18208,0.50,1.991 ,0.55,0.1800 ,0.57,12.467,0.79,0.5024,0.55,.693,1.994 ,0.54,0.17938,0.51,12.406,0.75,0.5016,0.54,.727
09JAA-0011-5 ,0.09,166,112,0.70, 71.6,"2,623  ",±14  ,"2,609  ",±19  ,"2,626  ",±15  ,"2,662  ",±10  ,"2,576",±28,1 ,1.990 ,0.64,0.1818 ,0.59,1.992 ,0.64,0.1810 ,0.61,12.53 ,0.89,0.5020,0.64,.721,1.989 ,0.64,0.1823 ,0.59,12.64 ,0.87,0.5029,0.64,.736
09JAA-0011-6 ,0.27,161,112,0.72, 67.9,"2,568  ",±15  ,"2,539  ",±20  ,"2,594  ",±17  ,"2,655  ",±16  ,"2,219",±34,3 ,2.038 ,0.71,0.1827 ,0.91,2.044 ,0.72,0.1802 ,0.98,12.16 ,1.2 ,0.4893,0.72,.591,2.018 ,0.71,0.1893 ,0.87,12.93 ,1.1 ,0.4955,0.71,.632
09JAA-0011-7 ,0.83,387,255,0.68,130  ,"2,108.8",± 8.0,"2,010.5",± 8.6,"2,085.7",± 9.4,"2,605  ",±14  ,"2,405",±44,19 ,2.563 ,0.42,0.18221,0.41,2.584 ,0.44,0.1748 ,0.86, 9.329,0.97,0.3870,0.44,.459,2.618 ,0.42,0.16761,0.48, 8.829,0.63,0.3820,0.42,.661
09JAA-0011-8C ,0.78,409,227,0.57,106  ,"1,683.5",± 6.9,"1,567.7",± 7.1,"1,639.6",± 9.5,"2,577  ",±12  ,"2,322",±31,35 ,3.325 ,0.45,0.17889,0.46,3.351 ,0.46,0.1719 ,0.71, 7.075,0.84,0.2984,0.46,.550,3.453 ,0.45,0.15248,0.62, 6.089,0.76,0.2896,0.45,.593
09JAA-0011-9C ,0.13,353,279,0.81,154  ,"2,637.3",± 9.6,"2,628  ",±13  ,"2,641  ",±11  ,"2,662.8",± 9.3,"2,598",±26,1 ,1.9758,0.44,0.18221,0.54,1.9783,0.44,0.1811 ,0.56,12.621,0.71,0.5055,0.44,.621,1.9752,0.44,0.18242,0.54,12.734,0.70,0.5063,0.44,.635
09JAA-0011-10 ,0.66,461,458,1.03,188  ,"2,489  ",±14  ,"2,443  ",±18  ,"2,501  ",±16  ,"2,644  ",±11  ,"2,381",±42,6 ,2.108 ,0.67,0.18496,0.51,2.122 ,0.68,0.1791 ,0.69,11.64 ,0.96,0.4712,0.68,.704,2.109 ,0.67,0.18456,0.51,12.06 ,0.84,0.4741,0.67,.799
09JAA-0011-11 ,2.36,306,235,0.79,117  ,"2,315  ",±19  ,"2,242  ",±22  ,"2,328  ",±21  ,"2,614  ",±19  ,"2,171",±66,11 ,2.259 ,0.95,0.19688,0.43,2.314 ,0.97,0.1758 ,1.1 ,10.48 ,1.5 ,0.4322,0.97,.656,2.299 ,0.95,0.18519,0.48,11.11 ,1.1 ,0.4350,0.95,.894
09JAA-0011-12 ,0.55,237,205,0.89,102  ,"2,616  ",±13  ,"2,596  ",±17  ,"2,615  ",±14  ,"2,674  ",±14  ,"2,630",±53,2 ,1.987 ,0.57,0.1872 ,0.56,1.998 ,0.59,0.1823 ,0.86,12.58 ,1.0 ,0.5006,0.59,.564,1.999 ,0.57,0.1831 ,0.57,12.63 ,0.81,0.5003,0.57,.707
09JAA-0011-13 ,0.21,167,102,0.63,72.3,"2,629",±40,"2,619",±54,"2,635",±43,"2,659.5",±8.9,"2,537",±53,1 ,1.982,1.9,0.18257,0.48,1.986,1.9,0.18072,0.54,12.55,1.9,0.5036,1.9,.961,1.980,1.9,0.18310,0.48,12.75,1.9,0.5050,1.9,.968
09JAA-0011-14 ,0.18,223,215,1.00,99.1,"2,683",±41,"2,691",±56,"2,686",±45,"2,660.1",±7.7,"2,652",±51,-1 ,1.934,1.9,0.18236,0.42,1.937,1.9,0.18078,0.46,12.87,1.9,0.5161,1.9,.970,1.935,1.9,0.18218,0.42,12.98,1.9,0.5169,1.9,.975
"   Errors are 1-sigma; Pbc and Pb* indicate the common and radiogenic portions, respectively.",,,,,,,,,,,,,,,,,,,,,,,,,,,,,,,,,,,,,,
   Error in Standard calibration was 0.24%( not included in above errors but required when comparing data from different mounts).,,,,,,,,,,,,,,,,,,,,,,,,,,,,,,,,,,,,,,
   (1) Common Pb corrected using measured 204Pb.,,,,,,,,,,,,,,,,,,,,,,,,,,,,,,,,,,,,,,
   (2) Common Pb corrected by assuming 206Pb/238U-207Pb/235U age-concordance,,,,,,,,,,,,,,,,,,,,,,,,,,,,,,,,,,,,,,
   (3) Common Pb corrected by assuming 206Pb/238U-208Pb/232Th age-concordance,,,,,,,,,,,,,,,,,,,,,,,,,,,,,,,,,,,,,,
,,,,,,,,,,,,,,,,,,,,,,,,,,,,,,,,,,,,,,
,,,,,,,,,,,,,,,,,,,,,,,,,,,,,,,,,,,,,,
,,,,,,,,,,,,,,,,,,,,,,,,,,,,,,,,,,,,,,
 Spot,"%
206Pbc","ppm
U","ppm
Th","232Th
/238U","ppm
206Pb*","(1)
206Pb
/238U
Age",,"(2)
206Pb
/238U
Age",,"(3)
206Pb
/238U
Age",,"(1)
207Pb
/206Pb
Age",,"(1)
208Pb
/232Th
Age",,"%
Dis-
cor-
dant","Total
238U
/206Pb",±%,"Total
207Pb
/206Pb",±%,"(1)
238U/
206Pb*",±%,"(1)
207Pb*
/206Pb*",±%,"(1)
207Pb*
/235U",±%,"(1)
206Pb*
/238U",±%,"err
corr","(3)
238U/
206Pb*",±%,"(3)
207Pb*
/206Pb*",±%,"(3)
207Pb*
/235U",±%,"(3)
206Pb*
/238U",±%,"err
corr"
09jaa-0012-1-1 ,0.13,143,52,0.37,   60.5,"2,579",±67,"2,554",± 87,"2,573",±69,"2,655  ",±12  ,"2,723",±95,3 ,2.030,3.1,0.1814 ,0.69,2.033,3.1,0.1803 ,0.73,12.23,3.2,0.492,3.1,.974,2.038,3.1,0.1787 ,0.70,12.09,3.2,0.491,3.1,.976
09jaa-0012-1-2 ,0.08,115,83,0.74,   50.5,"2,661",±69,"2,663",± 94,"2,668",±75,"2,655  ",±12  ,"2,569",±88,0 ,1.955,3.2,0.1809 ,0.69,1.957,3.2,0.1802 ,0.73,12.69,3.2,0.511,3.2,.974,1.951,3.2,0.1826 ,0.68,12.91,3.2,0.513,3.2,.977
09jaa-0012-2 ,0.17,106,58,0.56,   45.7,"2,614",±69,"2,587",± 90,"2,618",±73,"2,690  ",±14  ,"2,548",±90,3 ,1.997,3.2,0.1857 ,0.76,2.000,3.2,0.1841 ,0.83,12.69,3.3,0.500,3.2,.968,1.996,3.2,0.1857 ,0.76,12.83,3.3,0.501,3.2,.973
09jaa-0012-2-2 ,0.29,150,73,0.50,   64.2,"2,593",±67,"2,563",± 87,"2,595",±71,"2,682  ",±11  ,"2,553",±88,3 ,2.013,3.1,0.1858 ,0.61,2.019,3.1,0.1832 ,0.69,12.51,3.2,0.495,3.1,.976,2.017,3.1,0.1845 ,0.62,12.61,3.2,0.496,3.1,.981
09jaa-0012-3c ,0.11,216,84,0.40,   90.4,"2,556",±70,"2,512",± 89,"2,562",±73,"2,692.7",± 9.2,"2,403",±98,5 ,2.053,3.3,0.18532,0.53,2.055,3.3,0.1844 ,0.56,12.37,3.4,0.487,3.3,.986,2.049,3.3,0.18663,0.53,12.56,3.4,0.488,3.3,.988
09jaa-0012-4 ,0.74,299,366,1.26,  138  ,"2,752",±69,"2,787",±100,"2,761",±81,"2,668  ",±12  ,"2,686",±88,-3 ,1.864,3.1,0.1882 ,0.59,1.878,3.1,0.1816 ,0.74,13.33,3.2,0.533,3.1,.972,1.870,3.1,0.1860 ,0.60,13.71,3.2,0.535,3.1,.982
09jaa-0012-5m ,0.13,814,197,0.25,  342  ,"2,560",±65,"2,530",± 83,"2,565",±67,"2,652.6",± 4.6,"2,365",±76,3 ,2.048,3.1,0.18111,0.26,2.051,3.1,0.17997,0.28,12.10,3.1,0.488,3.1,.996,2.046,3.1,0.18185,0.26,12.25,3.1,0.489,3.1,.996
09jaa-0012-6c ,0.30,745,533,0.74,  335  ,"2,706",±68,"2,721",± 95,"2,717",±73,"2,669.2",± 5.9,"2,574",±81,-1 ,1.911,3.1,0.18447,0.26,1.917,3.1,0.18178,0.35,13.07,3.1,0.522,3.1,.993,1.908,3.1,0.18557,0.26,13.41,3.1,0.524,3.1,.996
09jaa-0012-7 ,0.22,358,90,0.26,  158  ,"2,661",±68,"2,651",± 91,"2,664",±69,"2,686.7",± 7.6,"2,546",±90,1 ,1.953,3.1,0.18568,0.41,1.957,3.1,0.18371,0.46,12.94,3.1,0.511,3.1,.989,1.955,3.1,0.18511,0.42,13.06,3.1,0.512,3.1,.991
09jaa-0012-8 ,0.19,231,140,0.62,   83.3,"2,253",±59,"2,156",± 67,"2,232",±64,"2,672.8",± 9.5,"2,562",±83,16 ,2.385,3.1,0.18390,0.53,2.390,3.1,0.1822 ,0.58,10.51,3.2,0.418,3.1,.983,2.417,3.1,0.17485,0.57, 9.98,3.2,0.414,3.1,.984
09jaa-0012-9 ,0.08,500,85,0.18,  218  ,"2,642",±67,"2,654",± 91,"2,645",±68,"2,609.3",± 5.9,"2,470",±83,-1 ,1.972,3.1,0.17605,0.34,1.974,3.1,0.17535,0.35,12.25,3.1,0.507,3.1,.994,1.971,3.1,0.17648,0.34,12.34,3.1,0.507,3.1,.994
09jaa-0012-10 ,0.03,315,187,0.61,  138  ,"2,649",±67,"2,647",± 91,"2,650",±72,"2,655.6",± 7.4,"2,634",±83,0 ,1.967,3.1,0.18055,0.45,1.968,3.1,0.18029,0.45,12.63,3.1,0.508,3.1,.990,1.967,3.1,0.18067,0.45,12.67,3.1,0.508,3.1,.990
09jaa-0012-11 ,0.13,179,95,0.55,   74.9,"2,556",±66,"2,518",± 84,"2,561",±70,"2,672  ",±11  ,"2,472",±83,4 ,2.053,3.1,0.1833 ,0.61,2.055,3.1,0.1821 ,0.66,12.22,3.2,0.487,3.1,.979,2.051,3.1,0.1840 ,0.61,12.37,3.2,0.488,3.1,.981
09jaa-0012-12c ,0.16,177,76,0.45,   76.2,"2,610",±67,"2,571",± 87,"2,608",±71,"2,723  ",±11  ,"2,659",±91,4 ,2.000,3.1,0.1893 ,0.62,2.004,3.1,0.1878 ,0.66,12.92,3.2,0.499,3.1,.978,2.006,3.1,0.1874 ,0.62,12.88,3.2,0.499,3.1,.981
09jaa-0012-13c ,0.39,3905,3860,1.02,"1,490  ","2,356",±60,"2,318",± 73,"2,420",±68,"2,507.4",± 3.8,"1,803",±56,6 ,2.258,3.1,0.16847,0.16,2.267,3.1,0.16499,0.22,10.04,3.1,0.441,3.1,.997,2.195,3.1,0.18787,0.21,11.80,3.1,0.456,3.1,.998
09JAA-0012-14R ,0.04,834,125,0.15,361,"2,627",±39,"2,617",±52,"2,628",±40,"2,656.9",±3.7,"2,551",±50,1 ,1.987,1.8,0.18077,0.22,1.988,1.8,0.18044,0.22,12.52,1.8,0.5031,1.8,.992,1.987,1.8,0.18089,0.22,12.55,1.8,0.5034,1.8,.993
09JAA-0012-15R ,0.22,928,197,0.22,362,"2,410",±36,"2,345",±44,"2,407",±37,"2,649.5",±4.1,"2,532",±54,9 ,2.201,1.8,0.18158,0.22,2.206,1.8,0.17964,0.25,11.23,1.8,0.4533,1.8,.991,2.209,1.8,0.17914,0.22,11.18,1.8,0.4527,1.8,.993
09JAA-0012-16C ,0.55,454,71,0.16,171,"2,340",±36,"2,261",±42,"2,347",±36,"2,651.5",±8.4,"1,893",±88,12 ,2.273,1.8,0.18478,0.42,2.285,1.8,0.17985,0.51,10.85,1.9,0.4376,1.8,.963,2.277,1.8,0.18358,0.42,11.12,1.9,0.4392,1.8,.974
09JAA-0012-17R ,0.04,914,197,0.22,346,"2,351",±36,"2,279",±42,"2,348",±36,"2,630.1",±3.9,"2,446",±47,11 ,2.272,1.8,0.17795,0.23,2.273,1.8,0.17755,0.24,10.77,1.8,0.4400,1.8,.992,2.275,1.8,0.17686,0.23,10.72,1.8,0.4395,1.8,.992
"   Errors are 1-sigma; Pbc and Pb* indicate the common and radiogenic portions, respectively.",,,,,,,,,,,,,,,,,,,,,,,,,,,,,,,,,,,,,,
   Error in Standard calibration was 0.79%( not included in above errors but required when comparing data from different mounts).,,,,,,,,,,,,,,,,,,,,,,,,,,,,,,,,,,,,,,
   (1) Common Pb corrected using measured 204Pb.,,,,,,,,,,,,,,,,,,,,,,,,,,,,,,,,,,,,,,
   (2) Common Pb corrected by assuming 206Pb/238U-207Pb/235U age-concordance,,,,,,,,,,,,,,,,,,,,,,,,,,,,,,,,,,,,,,
   (3) Common Pb corrected by assuming 206Pb/238U-208Pb/232Th age-concordance,,,,,,,,,,,,,,,,,,,,,,,,,,,,,,,,,,,,,,
,,,,,,,,,,,,,,,,,,,,,,,,,,,,,,,,,,,,,,
,,,,,,,,,,,,,,,,,,,,,,,,,,,,,,,,,,,,,,
,,,,,,,,,,,,,,,,,,,,,,,,,,,,,,,,,,,,,,
 Spot,"%
206Pbc","ppm
U","ppm
Th","232Th
/238U","ppm
206Pb*","(1)
206Pb
/238U
Age",,"(2)
206Pb
/238U
Age",,"(3)
206Pb
/238U
Age",,"(1)
207Pb
/206Pb
Age",,"(1)
208Pb
/232Th
Age",,"%
Dis-
cor-
dant","Total
238U
/206Pb",±%,"Total
207Pb
/206Pb",±%,"(1)
238U/
206Pb*",±%,"(1)
207Pb*
/206Pb*",±%,"(1)
207Pb*
/235U",±%,"(1)
206Pb*
/238U",±%,"err
corr","(3)
238U/
206Pb*",±%,"(3)
207Pb*
/206Pb*",±%,"(3)
207Pb*
/235U",±%,"(3)
206Pb*
/238U",±%,"err
corr"
09jaa-0013-1 ,0.21,140,82,0.61, 62.5,"2,697",±74,"2,698",±100,"2,700",±79,"2,693  ",±12  ,"2,642",± 95,0 ,1.921,3.4,0.1863 ,0.68,1.925,3.4,0.1844 ,0.75,13.21,3.4,0.519,3.4,.976,1.922,3.4,0.1859 ,0.68,13.34,3.4,0.520,3.4,.980
09jaa-0013-2 ,0.05,354,408,1.19,157  ,"2,683",±72,"2,675",± 98,"2,696",±82,"2,703.3",± 6.5,"2,581",± 85,1 ,1.936,3.3,0.18601,0.39,1.937,3.3,0.18557,0.40,13.21,3.3,0.516,3.3,.993,1.925,3.3,0.18980,0.38,13.59,3.3,0.519,3.3,.993
09jaa-0013-3c ,0.06,177,102,0.59, 78.7,"2,683",±69,"2,673",± 94,"2,688",±73,"2,707.6",± 9.7,"2,602",± 85,1 ,1.936,3.1,0.1866 ,0.57,1.938,3.1,0.1861 ,0.59,13.24,3.2,0.516,3.1,.983,1.933,3.1,0.1877 ,0.56,13.39,3.2,0.517,3.1,.984
09jaa-0013-4c ,0.03,213,127,0.62, 91.7,"2,620",±67,"2,590",± 88,"2,628",±72,"2,705.9",± 8.8,"2,505",± 80,3 ,1.994,3.1,0.18611,0.53,1.994,3.1,0.18587,0.53,12.85,3.2,0.501,3.1,.986,1.987,3.1,0.18827,0.52,13.06,3.2,0.503,3.1,.986
09jaa-0013-5c ,0.12,187,116,0.64, 81.7,"2,649",±69,"2,646",± 93,"2,659",±74,"2,659  ",±12  ,"2,511",±100,0 ,1.965,3.2,0.1818 ,0.65,1.967,3.2,0.1807 ,0.70,12.67,3.2,0.508,3.2,.976,1.959,3.2,0.1839 ,0.64,12.94,3.2,0.510,3.2,.980
09JAA-0013-6 ,0.14,221,73,0.34, 94.8,"2,605",±67,"2,570",± 87,"2,609",±69,"2,706.6",± 9.3,"2,503",± 86,4 ,2.005,3.1,0.18717,0.52,2.008,3.1,0.1859 ,0.56,12.77,3.2,0.498,3.1,.984,2.005,3.1,0.18737,0.52,12.89,3.2,0.499,3.1,.986
09JAA-0013-7 ,0.47,225,199,0.91, 96.5,"2,598",±67,"2,557",± 86,"2,624",±74,"2,718  ",±12  ,"2,333",± 83,4 ,2.006,3.1,0.1914 ,0.56,2.015,3.1,0.1872 ,0.71,12.81,3.2,0.496,3.1,.975,1.991,3.1,0.1964 ,0.54,13.60,3.2,0.502,3.1,.985
09JAA-0013-8 ,0.14,139,70,0.52, 59.5,"2,604",±71,"2,571",± 92,"2,607",±75,"2,701  ",±13  ,"2,553",± 89,4 ,2.006,3.3,0.1866 ,0.77,2.009,3.3,0.1853 ,0.79,12.72,3.4,0.498,3.3,.973,2.007,3.3,0.1865 ,0.77,12.82,3.4,0.498,3.3,.974
09JAA-0013-9 ,0.10,135,72,0.55, 61.0,"2,715",±70,"2,719",± 98,"2,720",±74,"2,705  ",±12  ,"2,639",± 89,0 ,1.907,3.2,0.1867 ,0.67,1.909,3.2,0.1858 ,0.70,13.42,3.2,0.524,3.2,.976,1.905,3.2,0.1873 ,0.66,13.55,3.2,0.525,3.2,.979
09JAA-0013-10c ,0.09,245,161,0.68,108  ,"2,670",±71,"2,663",± 97,"2,680",±77,"2,690  ",±13  ,"2,527",± 86,1 ,1.947,3.3,0.1849 ,0.74,1.949,3.3,0.1841 ,0.76,13.02,3.4,0.513,3.3,.974,1.940,3.3,0.1874 ,0.73,13.32,3.3,0.516,3.3,.976
09JAA-0013-11c ,0.21,179,120,0.69, 78.9,"2,662",±69,"2,652",± 94,"2,668",±75,"2,690  ",±13  ,"2,582",± 88,1 ,1.952,3.2,0.1859 ,0.72,1.956,3.2,0.1840 ,0.79,12.97,3.3,0.511,3.2,.971,1.950,3.2,0.1863 ,0.72,13.17,3.2,0.513,3.2,.975
09JAA-0013-12m ,0.04,494,34,0.07,213  ,"2,625",±69,"2,595",± 91,"2,626",±70,"2,712.4",± 6.5,"2,557",±110,3 ,1.988,3.2,0.18699,0.38,1.989,3.2,0.18660,0.40,12.93,3.2,0.503,3.2,.992,1.989,3.2,0.18685,0.39,12.95,3.2,0.503,3.2,.993
09JAA-0013-13R ,0.11,334,60,0.18,147,"2,668",±40,"2,657",±54,"2,673",±41,"2,696.8",±5.9,"2,380",±56,1 ,1.949,1.8,0.18578,0.34,1.951,1.8,0.18484,0.36,13.06,1.9,0.5126,1.8,.982,1.946,1.8,0.18670,0.34,13.23,1.9,0.5138,1.8,.983
09JAA-0013-14R ,0.06,669,91,0.14,269,"2,475",±38,"2,440",±48,"2,478",±39,"2,592.6",±4.2,"2,213",±49,5 ,2.136,1.9,0.17411,0.24,2.137,1.9,0.17359,0.25,11.20,1.9,0.4679,1.9,.991,2.133,1.9,0.17497,0.24,11.31,1.9,0.4688,1.9,.992
"   Errors are 1-sigma; Pbc and Pb* indicate the common and radiogenic portions, respectively.",,,,,,,,,,,,,,,,,,,,,,,,,,,,,,,,,,,,,,
   Error in Standard calibration was 0.79%( not included in above errors but required when comparing data from different mounts).,,,,,,,,,,,,,,,,,,,,,,,,,,,,,,,,,,,,,,
   (1) Common Pb corrected using measured 204Pb.,,,,,,,,,,,,,,,,,,,,,,,,,,,,,,,,,,,,,,
   (2) Common Pb corrected by assuming 206Pb/238U-207Pb/235U age-concordance,,,,,,,,,,,,,,,,,,,,,,,,,,,,,,,,,,,,,,
   (3) Common Pb corrected by assuming 206Pb/238U-208Pb/232Th age-concordance,,,,,,,,,,,,,,,,,,,,,,,,,,,,,,,,,,,,,,
,,,,,,,,,,,,,,,,,,,,,,,,,,,,,,,,,,,,,,
,,,,,,,,,,,,,,,,,,,,,,,,,,,,,,,,,,,,,,
,,,,,,,,,,,,,,,,,,,,,,,,,,,,,,,,,,,,,,
 Spot,"%
206Pbc","ppm
U","ppm
Th","232Th
/238U","ppm
206Pb*","(1)
206Pb
/238U
Age",,"(2)
206Pb
/238U
Age",,"(3)
206Pb
/238U
Age",,"(1)
207Pb
/206Pb
Age",,"(1)
208Pb
/232Th
Age",,"%
Dis-
cor-
dant","Total
238U
/206Pb",±%,"Total
207Pb
/206Pb",±%,"(1)
238U/
206Pb*",±%,"(1)
207Pb*
/206Pb*",±%,"(1)
207Pb*
/235U",±%,"(1)
206Pb*
/238U",±%,"err
corr","(3)
238U/
206Pb*",±%,"(3)
207Pb*
/206Pb*",±%,"(3)
207Pb*
/235U",±%,"(3)
206Pb*
/238U",±%,"err
corr"
09JAA-0019-1 ,0.30,93,38,0.43, 47.7,"3,023",±63,"3,255",±140,"3,014",±66,"2,670  ",±16  ,"3,241",±110,-13 ,1.666,2.6,0.1845 ,0.85,1.671,2.6,0.1818,0.99,15.00,2.8,0.598 ,2.6,.934,1.678,2.6,0.1798 ,0.88,14.78,2.7,0.596 ,2.6,.947
09JAA-0019-2c ,0.19,145,75,0.53, 65.2,"2,703",±48,"2,730",± 68,"2,707",±50,"2,633  ",±11  ,"2,644",± 66,-3 ,1.916,2.2,0.1796 ,0.62,1.919,2.2,0.1779,0.68,12.78,2.3,0.521 ,2.2,.954,1.917,2.2,0.1793 ,0.62,12.90,2.2,0.522 ,2.2,.961
09JAA-0019-3 ,0.52,315,146,0.48,110  ,"2,191",±39,"2,116",± 44,"2,189",±41,"2,544  ",±11  ,"2,229",± 58,14 ,2.457,2.1,0.17331,0.50,2.470,2.1,0.1686,0.65, 9.41,2.2,0.4048,2.1,.956,2.473,2.1,0.16893,0.51, 9.42,2.2,0.4044,2.1,.971
09JAA-0019-4 ,0.34,365,254,0.72,155  ,"2,583",±44,"2,558",± 58,"2,597",±48,"2,658  ",±10  ,"2,409",± 59,3 ,2.022,2.1,0.18360,0.41,2.029,2.1,0.1805,0.60,12.27,2.2,0.493 ,2.1,.961,2.016,2.1,0.18552,0.40,12.69,2.1,0.496 ,2.1,.982
09JAA-0019-5 ,0.16,289,94,0.34,128  ,"2,685",±46,"2,692",± 64,"2,689",±48,"2,664.6",± 9.8,"2,564",± 80,-1 ,1.933,2.1,0.18271,0.50,1.936,2.1,0.1813,0.59,12.91,2.2,0.517 ,2.1,.962,1.932,2.1,0.18291,0.50,13.05,2.2,0.518 ,2.1,.973
09JAA-0019-6 ,0.24,244,189,0.80,113  ,"2,772",±48,"2,808",± 70,"2,781",±52,"2,687  ",±11  ,"2,669",± 64,-3 ,1.857,2.1,0.18589,0.51,1.861,2.1,0.1838,0.66,13.61,2.2,0.537 ,2.1,.955,1.854,2.1,0.18689,0.51,13.90,2.2,0.539 ,2.1,.972
09JAA-0019-7c ,0.80,197,116,0.61, 88.6,"2,697",±48,"2,713",± 67,"2,710",±51,"2,653  ",±16  ,"2,496",± 86,-2 ,1.910,2.2,0.1872 ,0.59,1.925,2.2,0.1800,0.99,12.90,2.4,0.519 ,2.2,.908,1.914,2.2,0.1857 ,0.60,13.38,2.2,0.522 ,2.2,.964
09JAA-0019-8 ,0.23,336,240,0.74,148  ,"2,665",±46,"2,673",± 63,"2,677",±50,"2,642.4",± 9.4,"2,503",± 61,-1 ,1.949,2.1,0.18094,0.48,1.953,2.1,0.1789,0.57,12.62,2.2,0.512 ,2.1,.965,1.942,2.1,0.18331,0.48,13.01,2.2,0.515 ,2.1,.975
09JAA-0019-9c ,0.37,603,696,1.19,220  ,"2,273",±41,"2,222",± 48,"2,288",±47,"2,495  ",±10  ,"2,170",± 50,9 ,2.357,2.1,0.16705,0.40,2.365,2.1,0.1638,0.61, 9.55,2.2,0.4228,2.1,.961,2.347,2.1,0.16981,0.39, 9.97,2.2,0.4260,2.1,.983
09JAA-0019-10 ,0.56,126,55,0.45, 55.6,"2,661",±49,"2,675",± 67,"2,663",±52,"2,625  ",±19  ,"2,618",±130,-1 ,1.946,2.2,0.1820 ,0.77,1.957,2.2,0.1770,1.1 ,12.47,2.5,0.511 ,2.2,.894,1.955,2.2,0.1788 ,0.79,12.61,2.4,0.512 ,2.2,.943
09JAA-0019-11 ,1.50,337,273,0.84,155  ,"2,726",±41,"2,746",±58,"2,726",±45,"2,677  ",±12  ,"2,735",±68,-2 ,1.871,1.8,0.19599,0.42,1.900,1.8,0.1826 ,0.74,13.26,2.0,0.5264,1.8,.928,1.900,1.8,0.18560,0.46,13.47,1.9,0.5262,1.8,.970
09JAA-0019-12 ,0.17,302,164,0.56,138  ,"2,741",±42,"2,766",±60,"2,738",±45,"2,679.1",± 6.4,"2,790",±60,-2 ,1.884,1.9,0.18435,0.36,1.887,1.9,0.18287,0.39,13.36,1.9,0.5298,1.9,.979,1.890,1.9,0.18235,0.36,13.30,1.9,0.5292,1.9,.982
09JAA-0019-13 ,0.11,195,140,0.74, 85.0,"2,641",±40,"2,632",±54,"2,645",±44,"2,667.4",± 7.3,"2,599",±79,1 ,1.973,1.9,0.18254,0.42,1.975,1.9,0.18159,0.44,12.68,1.9,0.5064,1.9,.973,1.972,1.9,0.18287,0.42,12.79,1.9,0.5072,1.9,.976
09JAA-0019-14 ,0.24,323,216,0.69,140  ,"2,623",±39,"2,603",±52,"2,621",±42,"2,678.8",± 6.2,"2,641",±51,2 ,1.987,1.8,0.18494,0.33,1.992,1.8,0.18284,0.38,12.66,1.9,0.5021,1.8,.979,1.993,1.8,0.18291,0.34,12.65,1.9,0.5018,1.8,.983
"   Errors are 1-sigma; Pbc and Pb* indicate the common and radiogenic portions, respectively.",,,,,,,,,,,,,,,,,,,,,,,,,,,,,,,,,,,,,,
   Error in Standard calibration was 0.69%( not included in above errors but required when comparing data from different mounts).,,,,,,,,,,,,,,,,,,,,,,,,,,,,,,,,,,,,,,
   (1) Common Pb corrected using measured 204Pb.,,,,,,,,,,,,,,,,,,,,,,,,,,,,,,,,,,,,,,
   (2) Common Pb corrected by assuming 206Pb/238U-207Pb/235U age-concordance,,,,,,,,,,,,,,,,,,,,,,,,,,,,,,,,,,,,,,
   (3) Common Pb corrected by assuming 206Pb/238U-208Pb/232Th age-concordance,,,,,,,,,,,,,,,,,,,,,,,,,,,,,,,,,,,,,,
,,,,,,,,,,,,,,,,,,,,,,,,,,,,,,,,,,,,,,
,,,,,,,,,,,,,,,,,,,,,,,,,,,,,,,,,,,,,,
,,,,,,,,,,,,,,,,,,,,,,,,,,,,,,,,,,,,,,
 Spot,"%
206Pbc","ppm
U","ppm
Th","232Th
/238U","ppm
206Pb*","(1)
206Pb
/238U
Age",,"(2)
206Pb
/238U
Age",,"(3)
206Pb
/238U
Age",,"(1)
207Pb
/206Pb
Age",,"(1)
208Pb
/232Th
Age",,"%
Dis-
cor-
dant","Total
238U
/206Pb",±%,"Total
207Pb
/206Pb",±%,"(1)
238U/
206Pb*",±%,"(1)
207Pb*
/206Pb*",±%,"(1)
207Pb*
/235U",±%,"(1)
206Pb*
/238U",±%,"err
corr","(3)
238U/
206Pb*",±%,"(3)
207Pb*
/206Pb*",±%,"(3)
207Pb*
/235U",±%,"(3)
206Pb*
/238U",±%,"err
corr"
09JAA-0025-1 ,0.19,132,74,0.58, 56.6,"2,600  ",±16  ,"2,597",±21,"2,606",±17,"2,611  ",±12  ,"2,501",±40,0 ,2.009 ,0.73,0.1772 ,0.68,2.013 ,0.73,0.1755 ,0.74,12.02 ,1.0 ,0.4968,0.73,.703,2.007 ,0.73,0.1778 ,0.68,12.22 ,10   ,0.4983,0.73,.732
09JAA-0025-2 ,0.15,234,85,0.38,102  ,"2,640  ",±11  ,"2,637",±15,"2,642",±12,"2,649.9",± 8.7,"2,595",±35,0 ,1.973 ,0.51,0.18104,0.48,1.976 ,0.51,0.17968,0.52,12.539,0.73,0.5061,0.51,.701,1.974 ,0.51,0.18055,0.48,12.610, 0.71,0.5066,0.51,.727
09JAA-0025-3 ,0.34,126,97,0.79, 56.3,"2,689  ",±15  ,"2,703",±22,"2,691",±17,"2,649  ",±12  ,"2,662",±35,-1 ,1.926 ,0.70,0.1826 ,0.65,1.932 ,0.70,0.1796 ,0.75,12.82 ,1.0 ,0.5175,0.70,.684,1.930 ,0.70,0.1810 ,0.65,12.93 , 0.96,0.5180,0.70,.729
09JAA-0025-4 ,0.17,222,175,0.81, 98.2,"2,673  ",±12  ,"2,680",±17,"2,676",±13,"2,651  ",±14  ,"2,638",±29,-1 ,1.943 ,0.54,0.1813 ,0.77,1.947 ,0.54,0.1798 ,0.85,12.74 ,1.0 ,0.5137,0.54,.539,1.944 ,0.54,0.1811 ,0.77,12.85 , 0.94,0.5144,0.54,.572
09JAA-0025-5 ,0.06,388,342,0.91,173  ,"2,689.7",± 9.2,"2,701",±13,"2,693",±10,"2,660.3",± 6.4,"2,658",±17,-1 ,1.9303,0.42,0.18134,0.37,1.9314,0.42,0.18081,0.38,12.908,0.57,0.5178,0.42,.735,1.9287,0.42,0.18190,0.37,13.004, 0.56,0.5185,0.42,.746
09JAA-0025-6C ,0.55,119,77,0.66, 51.2,"2,603  ",±28  ,"2,594",±37,"2,613",±30,"2,627  ",±14  ,"2,457",±52,1 ,1.999 ,1.3 ,0.1822 ,0.67,2.010 ,1.3 ,0.1772 ,0.84,12.16 ,1.6 ,0.4974,1.3 ,.844,2.001 ,1.3 ,0.1817 ,0.67,12.52 , 1.5 ,0.4998,1.3 ,.891
09JAA-0025-7 ,0.20,207,85,0.42, 91.3,"2,667  ",±12  ,"2,678",±17,"2,669",±13,"2,636.2",± 9.2,"2,632",±35,-1 ,1.948 ,0.55,0.17998,0.51,1.951 ,0.55,0.17820,0.55,12.591,0.78,0.5124,0.55,.707,1.950 ,0.55,0.17910,0.51,12.663, 0.75,0.5128,0.55,.735
09JAA-0025-8 ,0.26,133,72,0.56, 59.2,"2,686  ",±15  ,"2,697",±21,"2,688",±16,"2,659  ",±12  ,"2,660",±42,-1 ,1.929 ,0.68,0.1829 ,0.63,1.934 ,0.68,0.1807 ,0.71,12.88 ,0.99,0.5170,0.68,.693,1.933 ,0.68,0.1817 ,0.64,12.96 , 0.93,0.5173,0.68,.730
09JAA-0025-9C ,0.51,170,87,0.53, 74.0,"2,633  ",±13  ,"2,630",±18,"2,638",±14,"2,643  ",±12  ,"2,551",±47,0 ,1.972 ,0.60,0.1835 ,0.59,1.982 ,0.61,0.1789 ,0.75,12.45 ,0.96,0.5045,0.61,.632,1.978 ,0.60,0.1814 ,0.60,12.65 , 0.85,0.5056,0.60,.707
09JAA-0025-10 ,0.24,174,120,0.71, 77.3,"2,683  ",±14  ,"2,705",±19,"2,692",±15,"2,626  ",±11  ,"2,564",±39,-2 ,1.932 ,0.62,0.1793 ,0.57,1.937 ,0.62,0.1771 ,0.64,12.61 ,0.89,0.5163,0.62,.696,1.929 ,0.62,0.1804 ,0.57,12.89 , 0.84,0.5184,0.62,.733
09JAA-0025-11C ,0.29,151,68,0.47, 66.8,"2,666  ",±14  ,"2,673",±20,"2,666",±15,"2,645  ",±11  ,"2,656",±43,-1 ,1.947 ,0.64,0.1817 ,0.60,1.953 ,0.65,0.1791 ,0.68,12.65 ,0.94,0.5121,0.65,.690,1.952 ,0.64,0.1799 ,0.61,12.70 , 0.88,0.5122,0.64,.728
09JAA-0025-12 ,0.44,105,53,0.52, 45.8,"2,640  ",±17  ,"2,647",±23,"2,644",±18,"2,622  ",±14  ,"2,576",±52,-1 ,1.967 ,0.77,0.1806 ,0.72,1.975 ,0.77,0.1767 ,0.85,12.34 ,1.2 ,0.5062,0.77,.672,1.972 ,0.77,0.1788 ,0.73,12.50 , 1.1 ,0.5070,0.77,.727
09JAA-0025-13 ,0.20,122,62,0.53,53.7,"2,671",±42,"2,678",±58,"2,677",±45,"2,652",±10,"2,565",±58,-1 ,1.944,1.9,0.1817,0.56,1.948,1.9,0.1799,0.61,12.74,2.0,0.5134,1.9,.953,1.942,1.9,0.1821,0.56,12.93,2.0,0.5148,1.9,.960
09JAA-0025-14 ,0.34,88,49,0.58,38.8,"2,676",±43,"2,691",±59,"2,682",±45,"2,635",±15,"2,572",±72,-2 ,1.937,1.9,0.1810,0.66,1.944,1.9,0.1780,0.88,12.63,2.1,0.514 ,1.9,.912,1.938,1.9,0.1807,0.66,12.86,2.1,0.516 ,1.9,.946
09JAA-0025-15 ,0.22,164,82,0.52,70.6,"2,617",±40,"2,609",±54,"2,621",±43,"2,639",±13,"2,528",±81,1 ,1.993,1.9,0.1805,0.76,1.997,1.9,0.1786,0.81,12.33,2.0,0.5006,1.9,.919,1.993,1.9,0.1805,0.76,12.49,2.0,0.5018,1.9,.926
"   Errors are 1-sigma; Pbc and Pb* indicate the common and radiogenic portions, respectively.",,,,,,,,,,,,,,,,,,,,,,,,,,,,,,,,,,,,,,
   Error in Standard calibration was 0.24%( not included in above errors but required when comparing data from different mounts).,,,,,,,,,,,,,,,,,,,,,,,,,,,,,,,,,,,,,,
   (1) Common Pb corrected using measured 204Pb.,,,,,,,,,,,,,,,,,,,,,,,,,,,,,,,,,,,,,,
   (2) Common Pb corrected by assuming 206Pb/238U-207Pb/235U age-concordance,,,,,,,,,,,,,,,,,,,,,,,,,,,,,,,,,,,,,,
   (3) Common Pb corrected by assuming 206Pb/238U-208Pb/232Th age-concordance,,,,,,,,,,,,,,,,,,,,,,,,,,,,,,,,,,,,,,
,,,,,,,,,,,,,,,,,,,,,,,,,,,,,,,,,,,,,,
,,,,,,,,,,,,,,,,,,,,,,,,,,,,,,,,,,,,,,
,,,,,,,,,,,,,,,,,,,,,,,,,,,,,,,,,,,,,,
 Spot,"%
206Pbc","ppm
U","ppm
Th","232Th
/238U","ppm
206Pb*","(1)
206Pb
/238U
Age",,"(2)
206Pb
/238U
Age",,"(3)
206Pb
/238U
Age",,"(1)
207Pb
/206Pb
Age",,"(1)
208Pb
/232Th
Age",,"%
Dis-
cor-
dant","Total
238U
/206Pb",±%,"Total
207Pb
/206Pb",±%,"(1)
238U/
206Pb*",±%,"(1)
207Pb*
/206Pb*",±%,"(1)
207Pb*
/235U",±%,"(1)
206Pb*
/238U",±%,"err
corr","(3)
238U/
206Pb*",±%,"(3)
207Pb*
/206Pb*",±%,"(3)
207Pb*
/235U",±%,"(3)
206Pb*
/238U",±%,"err
corr"
09JAA-0027-1C ,0.75,102,125,1.26,46.5 ,"2,725",±53,"2,756",± 76,"2,747",±61,"2,645",±17,"2,567",± 71,-3 ,1.887,2.4,0.1858,0.75,1.901,2.4,0.1791,1.0 ,12.99,2.6,0.526,2.4,.920,1.882,2.4,0.1874,0.74,13.73,2.5,0.531,2.4,.954
09JAA-0027-2 ,1.58,26,27,1.04,12.1 ,"2,717",±68,"2,748",± 97,"2,730",±77,"2,639",±37,"2,604",±120,-3 ,1.877,3.0,0.1927,1.4 ,1.907,3.1,0.1785,2.3 ,12.91,3.8,0.524,3.1,.805,1.896,3.0,0.1858,1.5 ,13.51,3.4,0.527,3.0,.900
09JAA-0027-3 ,2.17,17,16,0.97, 7.97,"2,778",±66,"2,829",± 99,"2,804",±75,"2,658",±51,"2,528",±160,-5 ,1.816,2.9,0.1999,1.7 ,1.856,2.9,0.1805,3.0 ,13.41,4.2,0.539,2.9,.695,1.835,2.9,0.1929,1.8 ,14.49,3.4,0.545,2.9,.854
09JAA-0027-4C ,0.68,31,44,1.47,14.2 ,"2,736",±58,"2,756",± 83,"2,733",±69,"2,688",±35,"2,755",± 86,-2 ,1.878,2.6,0.1899,1.8 ,1.891,2.6,0.1838,2.1 ,13.40,3.4,0.529,2.6,.772,1.894,2.6,0.1843,1.9 ,13.42,3.2,0.528,2.6,.803
09JAA-0027-5C ,0.21,135,182,1.39,61.9 ,"2,755",±49,"2,792",± 71,"2,757",±57,"2,664",±12,"2,737",± 63,-3 ,1.872,2.2,0.1831,0.66,1.876,2.2,0.1812,0.72,13.32,2.3,0.533,2.2,.950,1.873,2.2,0.1825,0.66,13.43,2.3,0.534,2.2,.957
09JAA-0027-6 ,0.85,38,24,0.65,17.4 ,"2,728",±75,"2,751",±110,"2,728",±81,"2,672",±28,"2,734",±130,-2 ,1.882,3.4,0.1897,1.2 ,1.898,3.4,0.1821,1.7 ,13.23,3.8,0.527,3.4,.892,1.898,3.4,0.1838,1.3 ,13.35,3.6,0.527,3.4,.933
09JAA-0027-7 ,2.08,25,37,1.50,11.8 ,"2,752",±80,"2,803",±120,"2,793",±96,"2,630",±55,"2,518",±140,-5 ,1.838,3.5,0.1960,1.5 ,1.878,3.6,0.1775,3.3 ,13.04,4.9,0.533,3.6,.731,1.844,3.5,0.1939,1.5 ,14.49,3.8,0.542,3.5,.921
09JAA-0027-8C ,1.13,30,31,1.06,12.6 ,"2,519",±57,"2,481",± 73,"2,531",±65,"2,646",±35,"2,421",±100,5 ,2.068,2.7,0.1893,1.4 ,2.091,2.8,0.1792,2.1 ,11.82,3.5,0.478,2.8,.791,2.080,2.7,0.1854,1.4 ,12.29,3.1,0.481,2.7,.884
09JAA-0027-9 ,0.99,33,42,1.31,15.2 ,"2,726",±57,"2,748",± 81,"2,749",±67,"2,670",±31,"2,569",±100,-2 ,1.881,2.6,0.1907,1.3 ,1.900,2.6,0.1819,1.9 ,13.20,3.2,0.526,2.6,.807,1.881,2.6,0.1910,1.3 ,14.00,2.9,0.532,2.6,.894
09JAA-0027-10 ,0.00,30,24,0.81,12.8 ,"2,575",±56,"2,541",± 72,"2,573",±61,"2,678",±25,"2,598",± 83,4 ,2.037,2.6,0.1827,1.5 ,2.037,2.6,0.1827,1.5 ,12.37,3.0,0.491,2.6,.869,2.039,2.6,0.1821,1.5 ,12.31,3.0,0.490,2.6,.868
09JAA-0027-11 ,0.32,147,177,1.24,65.2 ,"2,674",±50,"2,669",± 68,"2,686",±57,"2,686",±16,"2,585",± 67,0 ,1.939,2.3,0.1864,0.62,1.945,2.3,0.1836,0.94,13.01,2.5,0.514,2.3,.925,1.935,2.3,0.1881,0.62,13.40,2.4,0.517,2.3,.965
09JAA-0027-12C ,0.32,128,164,1.32,56.1 ,"2,644",±52,"2,640",± 70,"2,657",±61,"2,654",±14,"2,551",± 65,0 ,1.966,2.4,0.1830,0.71,1.973,2.4,0.1801,0.82,12.59,2.5,0.507,2.4,.947,1.960,2.4,0.1851,0.70,13.02,2.5,0.510,2.4,.960
09JAA-0027-13C ,9.39,103,112,1.12,47.6 ,"2,557",±50,"2,500",± 60,"2,542",±64,"2,731",±66,"2,673",±210,6 ,1.862,2.2,0.2723,0.98,2.054,2.3,0.1887,4.0 ,12.66,4.7,0.487,2.3,.505,2.069,2.2,0.2065,1.5 ,13.77,2.7,0.483,2.2,.823
"   Errors are 1-sigma; Pbc and Pb* indicate the common and radiogenic portions, respectively.",,,,,,,,,,,,,,,,,,,,,,,,,,,,,,,,,,,,,,
   Error in Standard calibration was 0.69%( not included in above errors but required when comparing data from different mounts).,,,,,,,,,,,,,,,,,,,,,,,,,,,,,,,,,,,,,,
   (1) Common Pb corrected using measured 204Pb.,,,,,,,,,,,,,,,,,,,,,,,,,,,,,,,,,,,,,,
   (2) Common Pb corrected by assuming 206Pb/238U-207Pb/235U age-concordance,,,,,,,,,,,,,,,,,,,,,,,,,,,,,,,,,,,,,,
   (3) Common Pb corrected by assuming 206Pb/238U-208Pb/232Th age-concordance,,,,,,,,,,,,,,,,,,,,,,,,,,,,,,,,,,,,,,
,,,,,,,,,,,,,,,,,,,,,,,,,,,,,,,,,,,,,,
,,,,,,,,,,,,,,,,,,,,,,,,,,,,,,,,,,,,,,
,,,,,,,,,,,,,,,,,,,,,,,,,,,,,,,,,,,,,,
 Spot,"%
206Pbc","ppm
U","ppm
Th","232Th
/238U","ppm
206Pb*","(1)
206Pb
/238U
Age",,"(2)
206Pb
/238U
Age",,"(3)
206Pb
/238U
Age",,"(1)
207Pb
/206Pb
Age",,"(1)
208Pb
/232Th
Age",,"%
Dis-
cor-
dant","Total
238U
/206Pb",±%,"Total
207Pb
/206Pb",±%,"(1)
238U/
206Pb*",±%,"(1)
207Pb*
/206Pb*",±%,"(1)
207Pb*
/235U",±%,"(1)
206Pb*
/238U",±%,"err
corr","(3)
238U/
206Pb*",±%,"(3)
207Pb*
/206Pb*",±%,"(3)
207Pb*
/235U",±%,"(3)
206Pb*
/238U",±%,"err
corr"
09JAA-0030-1 ,0.40,272,224,0.85,113  ,"2,526  ",±12  ,"2,496  ",±15  ,"2,535  ",±13  ,"2,625  ",±12  ,"2,427",±32,4 ,2.076 ,0.56,0.18056,0.52,2.084 ,0.57,0.1770 ,0.71,11.71 ,0.91,0.4797,0.57,.626,2.075 ,0.56,0.18083,0.52,12.014,0.76,0.4819,0.56,.735
09JAA-0030-2 ,0.24,329,715,2.25,138  ,"2,553  ",±11  ,"2,523  ",±14  ,"2,563  ",±15  ,"2,646.9",± 8.5,"2,516",±17,4 ,2.053 ,0.51,0.18146,0.46,2.058 ,0.51,0.17935,0.51,12.015,0.72,0.4859,0.51,.705,2.048 ,0.51,0.18329,0.45,12.341,0.68,0.4883,0.51,.747
09JAA-0030-3 ,0.28,243,315,1.34,102  ,"2,547  ",±21  ,"2,522  ",±27  ,"2,570  ",±25  ,"2,623  ",±10  ,"2,394",±31,3 ,2.059 ,0.99,0.17927,0.53,2.064 ,0.99,0.1768 ,0.60,11.81 ,1.2 ,0.4844,0.99,.855,2.041 ,0.99,0.18499,0.51,12.49 ,1.1 ,0.4899,0.99,.889
09JAA-0030-4 ,0.15,427,336,0.81,177  ,"2,542.6",± 9.3,"2,509  ",±12  ,"2,549  ",±12  ,"2,649.0",± 7.5,"2,471",±40,4 ,2.0650,0.44,0.18096,0.40,2.0681,0.44,0.17958,0.45,11.972,0.64,0.4835,0.44,.700,2.0620,0.44,0.18195,0.40,12.166,0.59,0.4850,0.44,.745
09JAA-0030-5 ,0.17,755,686,0.94,304  ,"2,473.6",± 7.1,"2,424.1",± 9.0,"2,480.3",± 9.3,"2,643.8",± 5.5,"2,410",±38,6 ,2.1343,0.35,0.18054,0.30,2.1379,0.35,0.17902,0.33,11.545,0.48,0.4677,0.35,.723,2.1310,0.35,0.18159,0.30,11.749,0.46,0.4693,0.35,.754
09JAA-0030-6 ,0.77,152,263,1.79, 66.0,"2,619  ",±16  ,"2,603  ",±21  ,"2,618  ",±20  ,"2,667  ",±16  ,"2,626",±31,2 ,1.979 ,0.71,0.1884 ,0.63,1.995 ,0.72,0.1816 ,0.96,12.55 ,1.2 ,0.5013,0.72,.604,1.996 ,0.71,0.1827 ,0.66,12.62 ,0.97,0.5010,0.71,.734
09JAA-0030-7 ,0.23,332,283,0.88,135,"2,488",±38,"2,441",±47,"2,496",±43,"2,647.4",±6.3,"2,404",±92,6 ,2.118,1.8,0.18149,0.34,2.123,1.8,0.17941,0.38,11.65,1.9,0.4710,1.8,.979,2.115,1.8,0.18258,0.34,11.90,1.9,0.4728,1.8,.983
09JAA-0030-8 ,0.08,635,541,0.88,258,"2,496",±38,"2,454",±47,"2,500",±42,"2,636.8",±4.5,"2,455",±62,5 ,2.113,1.8,0.17895,0.26,2.115,1.8,0.17826,0.27,11.62,1.8,0.4728,1.8,.989,2.111,1.8,0.17973,0.26,11.74,1.8,0.4737,1.8,.990
09JAA-0030-9 ,0.12,434,465,1.11,161,"2,316",±36,"2,251",±42,"2,286",±44,"2,584.6",±6.2,"2,547",±96,10 ,2.310,1.8,0.17386,0.34,2.313,1.8,0.17276,0.37,10.30,1.9,0.4323,1.8,.980,2.349,1.8,0.16217,0.39, 9.52,1.9,0.4256,1.8,.979
"   Errors are 1-sigma; Pbc and Pb* indicate the common and radiogenic portions, respectively.",,,,,,,,,,,,,,,,,,,,,,,,,,,,,,,,,,,,,,
   Error in Standard calibration was 0.24%( not included in above errors but required when comparing data from different mounts).,,,,,,,,,,,,,,,,,,,,,,,,,,,,,,,,,,,,,,
   (1) Common Pb corrected using measured 204Pb.,,,,,,,,,,,,,,,,,,,,,,,,,,,,,,,,,,,,,,
   (2) Common Pb corrected by assuming 206Pb/238U-207Pb/235U age-concordance,,,,,,,,,,,,,,,,,,,,,,,,,,,,,,,,,,,,,,
   (3) Common Pb corrected by assuming 206Pb/238U-208Pb/232Th age-concordance,,,,,,,,,,,,,,,,,,,,,,,,,,,,,,,,,,,,,,
,,,,,,,,,,,,,,,,,,,,,,,,,,,,,,,,,,,,,,
,,,,,,,,,,,,,,,,,,,,,,,,,,,,,,,,,,,,,,
,,,,,,,,,,,,,,,,,,,,,,,,,,,,,,,,,,,,,,
 Spot,"%
206Pbc","ppm
U","ppm
Th","232Th
/238U","ppm
206Pb*","(1)
206Pb
/238U
Age",,"(2)
206Pb
/238U
Age",,"(3)
206Pb
/238U
Age",,"(1)
207Pb
/206Pb
Age",,"(1)
208Pb
/232Th
Age",,"%
Dis-
cor-
dant","Total
238U
/206Pb",±%,"Total
207Pb
/206Pb",±%,"(1)
238U/
206Pb*",±%,"(1)
207Pb*
/206Pb*",±%,"(1)
207Pb*
/235U",±%,"(1)
206Pb*
/238U",±%,"err
corr","(3)
238U/
206Pb*",±%,"(3)
207Pb*
/206Pb*",±%,"(3)
207Pb*
/235U",±%,"(3)
206Pb*
/238U",±%,"err
corr"
09JAA-0036-1 ,0.56,191,159,0.86, 78.0,"2,502",±46,"2,480",±58,"2,509",±51,"2,576  ",±18  ,"2,431",± 67,3 ,2.097,2.2,0.1768 ,0.77,2.109,2.2,0.1719 ,1.0 ,11.24,2.4,0.474 ,2.2,.903,2.102,2.2,0.1752 ,0.78,11.50,2.3,0.476 ,2.2,.943
09JAA-0036-2 ,0.92,143,87,0.63, 61.9,"2,612",±48,"2,603",±64,"2,657",±51,"2,637  ",±28  ,"1,910",±120,1 ,1.983,2.2,0.1865 ,0.89,2.002,2.2,0.1782 ,1.7 ,12.28,2.8,0.500 ,2.2,.801,1.960,2.2,0.1945 ,0.84,13.68,2.4,0.510 ,2.2,.935
09JAA-0036-2-2 ,0.83,127,33,0.27, 51.2,"2,454",±47,"2,397",±58,"2,489",±49,"2,654  ",±20  ,"1,154",±140,8 ,2.140,2.3,0.1875 ,0.89,2.158,2.3,0.1801 ,1.2 ,11.51,2.6,0.463 ,2.3,.890,2.122,2.3,0.1932 ,0.85,12.56,2.5,0.471 ,2.3,.938
09JAA-0036-3c ,0.20,322,315,1.01,139  ,"2,627",±46,"2,636",±63,"2,639",±52,"2,602  ",±10  ,"2,521",± 57,-1 ,1.984,2.1,0.17638,0.56,1.988,2.1,0.1746 ,0.61,12.11,2.2,0.503 ,2.1,.962,1.977,2.1,0.17876,0.55,12.47,2.2,0.506 ,2.1,.969
09JAA-0036-4 ,0.46,223,123,0.57, 91.9,"2,515",±46,"2,472",±57,"2,521",±49,"2,656  ",±16  ,"2,417",± 75,5 ,2.086,2.2,0.1844 ,0.73,2.096,2.2,0.1803 ,0.96,11.86,2.4,0.477 ,2.2,.915,2.090,2.2,0.1832 ,0.74,12.09,2.3,0.479 ,2.2,.947
09JAA-0036-5c ,0.20,1587,345,0.22,701  ,"2,669",±45,"2,684",±62,"2,671",±46,"2,625.6",± 4.9,"2,564",± 64,-2 ,1.946,2.1,0.17890,0.26,1.950,2.1,0.17707,0.29,12.52,2.1,0.513 ,2.1,.990,1.948,2.1,0.17824,0.26,12.62,2.1,0.513 ,2.1,.992
09JAA-0036-6 ,0.52,193,6,0.03, 81.7,"2,568",±48,"2,537",±62,"2,565",±49,"2,664  ",±14  ,"3,429",±740,4 ,2.033,2.3,0.1858 ,0.74,2.044,2.3,0.1812 ,0.87,12.22,2.4,0.489 ,2.3,.934,2.046,2.3,0.1814 ,0.77,12.23,2.4,0.489 ,2.3,.948
09JAA-0036-7 ,0.39,95,49,0.53, 40.1,"2,557",±54,"2,537",±70,"2,579",±57,"2,617  ",±25  ,"2,156",±100,2 ,2.047,2.5,0.1796 ,1.3 ,2.054,2.6,0.1761 ,1.5 ,11.82,3.0,0.487 ,2.6,.860,2.033,2.5,0.1842 ,1.2 ,12.49,2.8,0.492 ,2.5,.899
09JAA-0036-8 ,1.17,136,58,0.44, 45.6,"2,100",±44,"2,008",±49,"2,138",±46,"2,572  ",±37  ,"1,312",±140,18 ,2.566,2.4,0.1820 ,1.4 ,2.597,2.5,0.1715 ,2.2 , 9.11,3.3,0.3851,2.5,.741,2.543,2.4,0.1882 ,1.4 ,10.21,2.8,0.3933,2.4,.875
09JAA-0036-9 ,0.09,241,156,0.67,122,"2,992",±46,"3,192",±94,"3,031",±49,"2,665.2",± 7.9,"2,403",±50,-12 ,1.692,1.9,0.18215,0.46,1.693,1.9,0.18134,0.48,14.77,2.0,0.591 ,1.9,.970,1.666,1.9,0.19268,0.43,15.95,2.0,0.600 ,1.9,.975
09JAA-0036-10 ,0.04,636,541,0.88,271,"2,596",±40,"2,586",±53,"2,602",±44,"2,627.5",± 4.2,"2,535",±48,1 ,2.016,1.9,0.17760,0.25,2.017,1.9,0.17728,0.25,12.12,1.9,0.4959,1.9,.991,2.011,1.9,0.17923,0.25,12.29,1.9,0.4972,1.9,.991
09JAA-0036-11 ,0.65,262,182,0.72,113,"2,601",±40,"2,593",±53,"2,594",±43,"2,627.2",± 9.0,"2,701",±63,1 ,1.999,1.9,0.18308,0.39,2.012,1.9,0.17724,0.54,12.15,1.9,0.4971,1.9,.960,2.019,1.9,0.17611,0.41,12.03,1.9,0.4953,1.9,.976
09JAA-0036-12 ,1.45,348,465,1.38,127,"2,248",±35,"2,158",±39,"2,359",±41,"2,641  ",±12  ,"1,566",±36,15 ,2.361,1.8,0.19170,0.34,2.396,1.8,0.1787 ,0.73,10.28,2.0,0.4173,1.8,.929,2.263,1.8,0.21967,0.34,13.38,1.9,0.4419,1.8,.983
"   Errors are 1-sigma; Pbc and Pb* indicate the common and radiogenic portions, respectively.",,,,,,,,,,,,,,,,,,,,,,,,,,,,,,,,,,,,,,
   Error in Standard calibration was 0.69%( not included in above errors but required when comparing data from different mounts).,,,,,,,,,,,,,,,,,,,,,,,,,,,,,,,,,,,,,,
   (1) Common Pb corrected using measured 204Pb.,,,,,,,,,,,,,,,,,,,,,,,,,,,,,,,,,,,,,,
   (2) Common Pb corrected by assuming 206Pb/238U-207Pb/235U age-concordance,,,,,,,,,,,,,,,,,,,,,,,,,,,,,,,,,,,,,,
   (3) Common Pb corrected by assuming 206Pb/238U-208Pb/232Th age-concordance,,,,,,,,,,,,,,,,,,,,,,,,,,,,,,,,,,,,,,
,,,,,,,,,,,,,,,,,,,,,,,,,,,,,,,,,,,,,,
,,,,,,,,,,,,,,,,,,,,,,,,,,,,,,,,,,,,,,
,,,,,,,,,,,,,,,,,,,,,,,,,,,,,,,,,,,,,,
 Spot,"%
206Pbc","ppm
U","ppm
Th","232Th
/238U","ppm
206Pb*","(1)
206Pb
/238U
Age",,"(2)
206Pb
/238U
Age",,"(3)
206Pb
/238U
Age",,"(1)
207Pb
/206Pb
Age",,"(1)
208Pb
/232Th
Age",,"%
Dis-
cor-
dant","Total
238U
/206Pb",±%,"Total
207Pb
/206Pb",±%,"(1)
238U/
206Pb*",±%,"(1)
207Pb*
/206Pb*",±%,"(1)
207Pb*
/235U",±%,"(1)
206Pb*
/238U",±%,"err
corr","(3)
238U/
206Pb*",±%,"(3)
207Pb*
/206Pb*",±%,"(3)
207Pb*
/235U",±%,"(3)
206Pb*
/238U",±%,"err
corr"
09JAA-0040-1 ,1.16,228,146,0.66, 92.3,"2,466",±53,"2,409",±65,"2,474",±58,"2,665  ",±13  ,"2,352",± 79,7 ,2.121,2.6,0.19165,0.47,2.146,2.6,0.1813 ,0.81,11.65,2.7,0.466,2.6,.955,2.137,2.6,0.18644,0.49,12.03,2.6,0.468,2.6,.983
09JAA-0040-2 ,0.20,209,91,0.45, 89.5,"2,605",±45,"2,599",±60,"2,614",±47,"2,625.0",± 9.2,"2,415",± 61,1 ,2.004,2.1,0.17875,0.50,2.008,2.1,0.17700,0.56,12.15,2.2,0.498,2.1,.967,2.000,2.1,0.18024,0.50,12.43,2.2,0.500,2.1,.973
09JAA-0040-3 ,0.36,310,105,0.35,153  ,"2,917",±49,"3,064",±89,"2,903",±51,"2,639.4",± 9.6,"3,303",± 87,-11 ,1.741,2.1,0.18178,0.49,1.747,2.1,0.1785 ,0.58,14.09,2.2,0.572,2.1,.964,1.758,2.1,0.17531,0.52,13.75,2.2,0.569,2.1,.971
09JAA-0040-4 ,0.64,320,111,0.36,135  ,"2,558",±46,"2,524",±59,"2,561",±48,"2,663.6",± 9.9,"2,475",± 82,4 ,2.040,2.2,0.18684,0.43,2.053,2.2,0.1812 ,0.60,12.17,2.3,0.487,2.2,.965,2.050,2.2,0.18350,0.44,12.34,2.2,0.488,2.2,.980
09JAA-0040-5 ,0.51,155,63,0.42, 69.0,"2,678",±47,"2,686",±64,"2,686",±49,"2,654  ",±12  ,"2,481",± 76,-1 ,1.932,2.1,0.1846 ,0.56,1.942,2.1,0.1801 ,0.70,12.79,2.2,0.515,2.1,.950,1.935,2.1,0.1838 ,0.56,13.10,2.2,0.517,2.1,.967
09JAA-0040-6c ,0.16,365,79,0.22,161  ,"2,669",±45,"2,676",±62,"2,671",±47,"2,650.5",± 6.8,"2,588",±140,-1 ,1.947,2.1,0.18115,0.37,1.950,2.1,0.17975,0.41,12.71,2.1,0.513,2.1,.981,1.948,2.1,0.18064,0.38,12.79,2.1,0.513,2.1,.984
09JAA-0040-7 ,0.02,1129,1403,1.28,506  ,"2,707",±45,"2,735",±64,"2,734",±52,"2,635.2",± 4.1,"2,524",± 55,-3 ,1.916,2.0,0.17826,0.24,1.916,2.0,0.17810,0.24,12.82,2.1,0.522,2.0,.993,1.893,2.0,0.18625,0.24,13.56,2.1,0.528,2.0,.993
09JAA-0040-8c ,0.23,481,321,0.69,213  ,"2,681",±45,"2,686",±62,"2,686",±49,"2,666.9",± 6.1,"2,611",± 56,-1 ,1.935,2.1,0.18358,0.33,1.939,2.1,0.18153,0.37,12.91,2.1,0.516,2.1,.985,1.935,2.1,0.18358,0.33,13.08,2.1,0.517,2.1,.987
09JAA-0040-9c ,0.20,276,36,0.14,123  ,"2,683",±46,"2,702",±64,"2,683",±47,"2,632  ",±11  ,"2,669",±110,-2 ,1.933,2.1,0.1796 ,0.64,1.937,2.1,0.1778 ,0.68,12.65,2.2,0.516,2.1,.951,1.937,2.1,0.1782 ,0.64,12.69,2.2,0.516,2.1,.956
09JAA-0040-10 ,0.03,1015,927,0.94,437,"2,617",±39,"2,600",±51,"2,622",±43,"2,667.6",±3.1,"2,577",±48,2 ,1.996,1.8,0.18184,0.19,1.997,1.8,0.18161,0.19,12.54,1.8,0.5009,1.8,.995,1.993,1.8,0.18300,0.18,12.66,1.8,0.5018,1.8,.995
09JAA-0040-11C ,0.03,613,46,0.08,264,"2,623",±39,"2,604",±52,"2,624",±39,"2,678.3",±4.2,"2,557",±79,2 ,1.991,1.8,0.18304,0.25,1.991,1.8,0.18278,0.25,12.66,1.8,0.5022,1.8,.990,1.991,1.8,0.18300,0.25,12.68,1.8,0.5023,1.8,.991
09JAA-0040-12R ,0.09,322,31,0.10,142,"2,675",±40,"2,669",±55,"2,676",±41,"2,689.2",±6.0,"2,527",±81,1 ,1.943,1.8,0.18484,0.35,1.945,1.8,0.18400,0.36,13.05,1.9,0.5142,1.8,.981,1.943,1.8,0.18465,0.35,13.10,1.9,0.5146,1.8,.983
09JAA-0040-13 ,0.24,713,376,0.55,295,"2,528",±38,"2,478",±48,"2,530",±41,"2,688.0",±4.9,"2,499",±92,6 ,2.078,1.8,0.18603,0.23,2.083,1.8,0.18386,0.30,12.17,1.8,0.4801,1.8,.987,2.081,1.8,0.18491,0.23,12.25,1.8,0.4805,1.8,.992
"   Errors are 1-sigma; Pbc and Pb* indicate the common and radiogenic portions, respectively.",,,,,,,,,,,,,,,,,,,,,,,,,,,,,,,,,,,,,,
   Error in Standard calibration was 0.69%( not included in above errors but required when comparing data from different mounts).,,,,,,,,,,,,,,,,,,,,,,,,,,,,,,,,,,,,,,
   (1) Common Pb corrected using measured 204Pb.,,,,,,,,,,,,,,,,,,,,,,,,,,,,,,,,,,,,,,
   (2) Common Pb corrected by assuming 206Pb/238U-207Pb/235U age-concordance,,,,,,,,,,,,,,,,,,,,,,,,,,,,,,,,,,,,,,
   (3) Common Pb corrected by assuming 206Pb/238U-208Pb/232Th age-concordance,,,,,,,,,,,,,,,,,,,,,,,,,,,,,,,,,,,,,,
,,,,,,,,,,,,,,,,,,,,,,,,,,,,,,,,,,,,,,
,,,,,,,,,,,,,,,,,,,,,,,,,,,,,,,,,,,,,,
,,,,,,,,,,,,,,,,,,,,,,,,,,,,,,,,,,,,,,
 Spot,"%
206Pbc","ppm
U","ppm
Th","232Th
/238U","ppm
206Pb*","(1)
206Pb
/238U
Age",,"(2)
206Pb
/238U
Age",,"(3)
206Pb
/238U
Age",,"(1)
207Pb
/206Pb
Age",,"(1)
208Pb
/232Th
Age",,"%
Dis-
cor-
dant","Total
238U
/206Pb",±%,"Total
207Pb
/206Pb",±%,"(1)
238U/
206Pb*",±%,"(1)
207Pb*
/206Pb*",±%,"(1)
207Pb*
/235U",±%,"(1)
206Pb*
/238U",±%,"err
corr","(3)
238U/
206Pb*",±%,"(3)
207Pb*
/206Pb*",±%,"(3)
207Pb*
/235U",±%,"(3)
206Pb*
/238U",±%,"err
corr"
09jaa-0044-1 ,0.10,142,77,0.56,66.1,"2,785",±72,"2,812",±110,"2,788",±77,"2,720.9",± 9.6,"2,730",±96,-2 ,1.849,3.2,0.1885 ,0.57,1.851,3.2,0.1876 ,0.58,13.97,3.3,0.540,3.2,.984,1.848,3.2,0.1887 ,0.57,14.08,3.3,0.541,3.2,.985
09jaa-0044-2-1 ,0.09,121,46,0.39,56.1,"2,783",±72,"2,821",±110,"2,786",±75,"2,697  ",±11  ,"2,708",±92,-3 ,1.850,3.2,0.1856 ,0.65,1.852,3.2,0.1848 ,0.66,13.76,3.2,0.540,3.2,.979,1.850,3.2,0.1859 ,0.65,13.86,3.2,0.541,3.2,.980
09jaa-0044-2-2 ,0.05,73,50,0.70,34.1,"2,789",±73,"2,818",±110,"2,791",±79,"2,724  ",±15  ,"2,758",±99,-2 ,1.846,3.2,0.1883 ,0.89,1.847,3.2,0.1879 ,0.91,14.02,3.3,0.541,3.2,.963,1.845,3.2,0.1887 ,0.88,14.10,3.3,0.542,3.2,.964
09jaa-0044-2-3 ,0.09,127,46,0.37,58.8,"2,778",±72,"2,816",±110,"2,781",±75,"2,689  ",±16  ,"2,697",±94,-3 ,1.854,3.2,0.1848 ,0.97,1.856,3.2,0.1840 ,0.98,13.67,3.3,0.539,3.2,.955,1.853,3.2,0.1851 ,0.96,13.77,3.3,0.540,3.2,.957
09JAA-0044-3 ,0.08,131,88,0.69,60.7,"2,779",±71,"2,796",±100,"2,784",±76,"2,740  ",±10  ,"2,710",±88,-1 ,1.854,3.1,0.1904 ,0.62,1.855,3.1,0.1897 ,0.63,14.10,3.2,0.539,3.1,.981,1.851,3.1,0.1913 ,0.62,14.25,3.2,0.540,3.1,.981
09JAA-0044-4c ,0.25,113,50,0.46,52.1,"2,758",±71,"2,769",±100,"2,763",±74,"2,731  ",±12  ,"2,638",±96,-1 ,1.868,3.1,0.1909 ,0.65,1.873,3.1,0.1887 ,0.74,13.89,3.2,0.534,3.1,.973,1.868,3.1,0.1909 ,0.65,14.09,3.2,0.535,3.1,.979
09JAA-0044-5c ,0.19,82,39,0.49,37.7,"2,767",±72,"2,792",±100,"2,771",±75,"2,709  ",±14  ,"2,689",±97,-2 ,1.862,3.2,0.1880 ,0.77,1.865,3.2,0.1863 ,0.84,13.77,3.3,0.536,3.2,.967,1.862,3.2,0.1879 ,0.77,13.91,3.3,0.537,3.2,.972
09JAA-0044-6c ,0.25,134,76,0.58,60.3,"2,710",±69,"2,701",± 96,"2,711",±74,"2,735  ",±11  ,"2,694",±91,1 ,1.909,3.1,0.1914 ,0.61,1.913,3.1,0.1892 ,0.68,13.63,3.2,0.523,3.1,.977,1.913,3.1,0.1900 ,0.62,13.70,3.2,0.523,3.1,.981
09jaa-0044-7 ,0.33,95,52,0.57,42.6,"2,704",±70,"2,687",± 96,"2,708",±74,"2,749  ",±14  ,"2,641",±96,2 ,1.912,3.2,0.1937 ,0.72,1.919,3.2,0.1908 ,0.84,13.71,3.3,0.521,3.2,.966,1.916,3.2,0.1926 ,0.73,13.87,3.2,0.522,3.2,.975
09jaa-0044-8 ,0.07,141,65,0.47,60.2,"2,601",±67,"2,554",± 87,"2,607",±71,"2,738  ",±10  ,"2,476",±82,5 ,2.011,3.1,0.1902 ,0.63,2.012,3.1,0.1895 ,0.63,12.99,3.2,0.497,3.1,.980,2.006,3.1,0.1916 ,0.62,13.17,3.2,0.498,3.1,.981
09jaa-0044-9 ,0.10,210,113,0.55,96.0,"2,743",±69,"2,746",± 98,"2,747",±73,"2,734.0",± 8.2,"2,657",±85,0 ,1.884,3.1,0.18994,0.48,1.886,3.1,0.18906,0.50,13.82,3.1,0.530,3.1,.987,1.882,3.1,0.19073,0.48,13.98,3.1,0.531,3.1,.988
09JAA-0044-10c ,0.18,122,88,0.74,56.6,"2,774",±71,"2,796",±100,"2,789",±77,"2,724  ",±12  ,"2,583",±91,-2 ,1.856,3.2,0.1895 ,0.68,1.859,3.2,0.1879 ,0.73,13.93,3.2,0.538,3.2,.974,1.847,3.2,0.1926 ,0.66,14.38,3.2,0.541,3.2,.979
09JAA-0044-11c ,0.33,133,71,0.55,62.3,"2,800",±71,"2,836",±110,"2,805",±76,"2,718  ",±12  ,"2,704",±95,-3 ,1.832,3.1,0.1902 ,0.61,1.838,3.1,0.1873 ,0.72,14.05,3.2,0.544,3.1,.975,1.834,3.1,0.1896 ,0.62,14.25,3.2,0.545,3.1,.981
09JAA-0044-11 ,0.20,75,34,0.47,32.8,"2,640",±69,"2,622",± 92,"2,644",±73,"2,692  ",±15  ,"2,576",±96,2 ,1.971,3.2,0.1861 ,0.83,1.975,3.2,0.1843 ,0.92,12.86,3.3,0.506,3.2,.961,1.973,3.2,0.1857 ,0.84,12.98,3.3,0.507,3.2,.967
09JAA-0044-12 ,0.04,174,133,0.79,75.6,"2,644",±68,"2,625",± 90,"2,648",±74,"2,696.3",± 8.9,"2,592",±89,2 ,1.972,3.1,0.18517,0.53,1.972,3.1,0.18479,0.54,12.92,3.2,0.507,3.1,.985,1.968,3.1,0.18625,0.53,13.05,3.2,0.508,3.1,.986
09JAA-0044-12R ,0.17,128,94,0.76,61.1,"2,837",±45,"2,882",±68,"2,840",±48,"2,739.1",± 9.8,"2,792",±60,-4 ,1.806,1.9,0.1912,0.55,1.809,1.9,0.1896,0.60,14.46,2.0,0.553,1.9,.956,1.806,1.9,0.1911,0.55,14.59,2.0,0.554,1.9,.962
09JAA-0044-13 ,0.29,125,63,0.52,57.1,"2,735",±43,"2,744",±60,"2,746",±45,"2,714  ",±11  ,"2,539",±63,-1 ,1.886,1.9,0.1894,0.56,1.892,1.9,0.1868,0.66,13.61,2.0,0.529,1.9,.946,1.883,1.9,0.1905,0.56,13.95,2.0,0.531,1.9,.960
09JAA-0044-14R ,0.06,135,78,0.60,62.7,"2,785",±43,"2,809",±63,"2,786",±46,"2,729  ",±10  ,"2,755",±57,-2 ,1.850,1.9,0.1890,0.61,1.851,1.9,0.1885,0.62,14.04,2.0,0.540,1.9,.951,1.849,1.9,0.1891,0.61,14.10,2.0,0.541,1.9,.952
09JAA-0044-15R ,0.09,108,70,0.67,50.8,"2,821",±44,"2,862",±67,"2,825",±48,"2,729  ",±11  ,"2,765",±60,-3 ,1.820,1.9,0.1894,0.64,1.822,1.9,0.1885,0.67,14.27,2.1,0.549,1.9,.946,1.819,1.9,0.1899,0.64,14.39,2.0,0.550,1.9,.950
"   Errors are 1-sigma; Pbc and Pb* indicate the common and radiogenic portions, respectively.",,,,,,,,,,,,,,,,,,,,,,,,,,,,,,,,,,,,,,
   Error in Standard calibration was 0.79%( not included in above errors but required when comparing data from different mounts).,,,,,,,,,,,,,,,,,,,,,,,,,,,,,,,,,,,,,,
   (1) Common Pb corrected using measured 204Pb.,,,,,,,,,,,,,,,,,,,,,,,,,,,,,,,,,,,,,,
   (2) Common Pb corrected by assuming 206Pb/238U-207Pb/235U age-concordance,,,,,,,,,,,,,,,,,,,,,,,,,,,,,,,,,,,,,,
   (3) Common Pb corrected by assuming 206Pb/238U-208Pb/232Th age-concordance,,,,,,,,,,,,,,,,,,,,,,,,,,,,,,,,,,,,,,
,,,,,,,,,,,,,,,,,,,,,,,,,,,,,,,,,,,,,,
,,,,,,,,,,,,,,,,,,,,,,,,,,,,,,,,,,,,,,
,,,,,,,,,,,,,,,,,,,,,,,,,,,,,,,,,,,,,,
 Spot,"%
206Pbc","ppm
U","ppm
Th","232Th
/238U","ppm
206Pb*","(1)
206Pb
/238U
Age",,"(2)
206Pb
/238U
Age",,"(3)
206Pb
/238U
Age",,"(1)
207Pb
/206Pb
Age",,"(1)
208Pb
/232Th
Age",,"%
Dis-
cor-
dant","Total
238U
/206Pb",±%,"Total
207Pb
/206Pb",±%,"(1)
238U/
206Pb*",±%,"(1)
207Pb*
/206Pb*",±%,"(1)
207Pb*
/235U",±%,"(1)
206Pb*
/238U",±%,"err
corr","(3)
238U/
206Pb*",±%,"(3)
207Pb*
/206Pb*",±%,"(3)
207Pb*
/235U",±%,"(3)
206Pb*
/238U",±%,"err
corr"
09JAA-0045-1 ,0.31,107,67,0.65,46.4,"2,634",±48,"2,627",±65,"2,640",±52,"2,654",±15,"2,552",± 71,1 ,1.975,2.2,0.1828,0.79,1.981,2.2,0.1801,0.92,12.53,2.4,0.505,2.2,.925,1.976,2.2,0.1825,0.79,12.73,2.4,0.506,2.2,.943
09JAA-0045-2 ,0.27,61,45,0.77,26.3,"2,618",±51,"2,589",±68,"2,618",±56,"2,700",±19,"2,616",± 75,3 ,1.991,2.4,0.1876,1.1 ,1.996,2.4,0.1852,1.2 ,12.79,2.6,0.501,2.4,.900,1.996,2.4,0.1858,1.1 ,12.84,2.6,0.501,2.4,.910
09JAA-0045-3 ,0.38,89,61,0.71,38.8,"2,628",±49,"2,613",±65,"2,631",±53,"2,670",±17,"2,588",± 77,2 ,1.979,2.3,0.1853,0.86,1.987,2.3,0.1819,1.0 ,12.62,2.5,0.503,2.3,.913,1.984,2.3,0.1836,0.87,12.76,2.4,0.504,2.3,.933
09JAA-0045-4 ,0.62,54,23,0.44,24.0,"2,687",±54,"2,700",±75,"2,692",±56,"2,653",±24,"2,571",±130,-1 ,1.922,2.4,0.1855,1.1 ,1.933,2.4,0.1801,1.5 ,12.84,2.8,0.517,2.4,.857,1.929,2.4,0.1829,1.1 ,13.08,2.7,0.518,2.4,.905
09JAA-0045-5 ,0.34,109,66,0.62,49.2,"2,718",±50,"2,739",±72,"2,725",±54,"2,666",±18,"2,614",± 84,-2 ,1.900,2.3,0.1845,0.86,1.906,2.3,0.1814,1.1 ,13.12,2.5,0.525,2.3,.902,1.901,2.3,0.1842,0.86,13.36,2.4,0.526,2.3,.935
09JAA-0045-6c ,0.51,51,28,0.57,22.9,"2,709",±55,"2,718",±77,"2,708",±59,"2,686",±22,"2,737",± 94,-1 ,1.905,2.5,0.1882,1.2 ,1.914,2.5,0.1837,1.3 ,13.23,2.8,0.522,2.5,.884,1.916,2.5,0.1842,1.2 ,13.26,2.8,0.522,2.5,.900
09JAA-0045-7 ,0.28,154,123,0.83,65.7,"2,595",±48,"2,577",±63,"2,594",±53,"2,651",±14,"2,610",± 68,2 ,2.012,2.3,0.1824,0.76,2.017,2.3,0.1798,0.86,12.29,2.4,0.496,2.3,.934,2.018,2.3,0.1800,0.77,12.30,2.4,0.495,2.3,.946
09JAA-0045-8c ,0.42,98,59,0.63,43.6,"2,688",±51,"2,689",±71,"2,694",±54,"2,685",±29,"2,605",± 83,0 ,1.925,2.3,0.1873,1.6 ,1.933,2.3,0.1835,1.8 ,13.09,2.9,0.517,2.3,.795,1.928,2.3,0.1861,1.6 ,13.31,2.8,0.519,2.3,.816
09JAA-0045-9 ,0.48,87,61,0.73,36.8,"2,568",±50,"2,534",±65,"2,570",±54,"2,674",±25,"2,548",± 84,4 ,2.034,2.4,0.1865,1.4 ,2.043,2.4,0.1823,1.5 ,12.30,2.8,0.489,2.4,.838,2.042,2.4,0.1838,1.4 ,12.41,2.7,0.490,2.4,.861
09JAA-0045-10c ,0.53,169,69,0.42,67.0,"2,433",±46,"2,390",±56,"2,427",±48,"2,591",±19,"2,570",±100,6 ,2.169,2.2,0.1781,0.81,2.180,2.3,0.1734,1.2 ,10.97,2.5,0.459,2.3,.889,2.187,2.2,0.1724,0.85,10.87,2.4,0.457,2.2,.935
09JAA-0045-11 ,0.88,125,87,0.72,55.7,"2,668",±55,"2,676",±75,"2,676",±60,"2,645",±20,"2,564",±110,-1 ,1.934,2.5,0.1870,0.87,1.951,2.5,0.1791,1.2 ,12.66,2.8,0.513,2.5,.899,1.944,2.5,0.1834,0.90,13.01,2.6,0.514,2.5,.941
09JAA-0045-12 ,0.62,128,78,0.63,56.0,"2,639",±59,"2,620",±79,"2,645",±63,"2,694",±20,"2,552",± 95,2 ,1.964,2.7,0.1901,0.94,1.976,2.7,0.1846,1.2 ,12.87,3.0,0.506,2.7,.918,1.971,2.7,0.1877,0.95,13.13,2.9,0.507,2.7,.944
09JAA-0045-13c ,0.88,109,47,0.45,47.2,"2,622",±52,"2,600",±69,"2,623",±55,"2,682",±30,"2,584",±190,2 ,1.975,2.4,0.1911,1.0 ,1.993,2.4,0.1832,1.8 ,12.68,3.0,0.502,2.4,.806,1.991,2.4,0.1856,1.0 ,12.85,2.6,0.502,2.4,.918
09JAA-0045-14c ,1.19,99,58,0.60,40.3,"2,474",±54,"2,416",±66,"2,481",±58,"2,673",±39,"2,370",±160,7 ,2.112,2.6,0.1928,1.6 ,2.137,2.6,0.1822,2.3 ,11.76,3.5,0.468,2.6,.746,2.130,2.6,0.1870,1.7 ,12.10,3.1,0.469,2.6,.837
"   Errors are 1-sigma; Pbc and Pb* indicate the common and radiogenic portions, respectively.",,,,,,,,,,,,,,,,,,,,,,,,,,,,,,,,,,,,,,
   Error in Standard calibration was 0.69%( not included in above errors but required when comparing data from different mounts).,,,,,,,,,,,,,,,,,,,,,,,,,,,,,,,,,,,,,,
   (1) Common Pb corrected using measured 204Pb.,,,,,,,,,,,,,,,,,,,,,,,,,,,,,,,,,,,,,,
   (2) Common Pb corrected by assuming 206Pb/238U-207Pb/235U age-concordance,,,,,,,,,,,,,,,,,,,,,,,,,,,,,,,,,,,,,,
   (3) Common Pb corrected by assuming 206Pb/238U-208Pb/232Th age-concordance,,,,,,,,,,,,,,,,,,,,,,,,,,,,,,,,,,,,,,
,,,,,,,,,,,,,,,,,,,,,,,,,,,,,,,,,,,,,,
,,,,,,,,,,,,,,,,,,,,,,,,,,,,,,,,,,,,,,
,,,,,,,,,,,,,,,,,,,,,,,,,,,,,,,,,,,,,,
 Spot,"%
206Pbc","ppm
U","ppm
Th","232Th
/238U","ppm
206Pb*","(1)
206Pb
/238U
Age",,"(2)
206Pb
/238U
Age",,"(3)
206Pb
/238U
Age",,"(1)
207Pb
/206Pb
Age",,"(1)
208Pb
/232Th
Age",,"%
Dis-
cor-
dant","Total
238U
/206Pb",±%,"Total
207Pb
/206Pb",±%,"(1)
238U/
206Pb*",±%,"(1)
207Pb*
/206Pb*",±%,"(1)
207Pb*
/235U",±%,"(1)
206Pb*
/238U",±%,"err
corr","(3)
238U/
206Pb*",±%,"(3)
207Pb*
/206Pb*",±%,"(3)
207Pb*
/235U",±%,"(3)
206Pb*
/238U",±%,"err
corr"
09jaa-0046-1 ,0.22,89,56,0.66, 40.5,"2,743",±72,"2,766",±100,"2,747",±77,"2,685  ",±15  ,"2,679",± 95,-2 ,1.881,3.2,0.1856 ,0.80,1.885,3.2,0.1836 ,0.89,13.42,3.3,0.530,3.2,.964,1.882,3.2,0.1854 ,0.80,13.58,3.3,0.531,3.2,.970
09jaa-0046-2 ,0.13,89,46,0.53, 37.5,"2,569",±67,"2,535",± 87,"2,576",±71,"2,673  ",±18  ,"2,435",± 84,4 ,2.040,3.2,0.1833 ,1.1 ,2.043,3.2,0.1821 ,1.1 ,12.30,3.3,0.490,3.2,.946,2.035,3.2,0.1848 ,1.0 ,12.52,3.3,0.491,3.2,.950
09jaa-0046-3c ,0.05,226,134,0.61,100.0,"2,685",±68,"2,683",± 94,"2,688",±73,"2,688.2",± 8.4,"2,628",± 84,0 ,1.935,3.1,0.18437,0.50,1.936,3.1,0.18389,0.51,13.10,3.1,0.517,3.1,.987,1.933,3.1,0.18512,0.49,13.21,3.1,0.517,3.1,.988
09jaa-0046-4 ,0.06,126,86,0.70, 55.3,"2,657",±68,"2,643",± 92,"2,664",±74,"2,695  ",±11  ,"2,561",± 84,1 ,1.959,3.1,0.1852 ,0.64,1.961,3.1,0.1846 ,0.66,12.98,3.2,0.510,3.1,.979,1.954,3.1,0.1870 ,0.64,13.19,3.2,0.512,3.1,.980
09jaa-0046-5 ,0.22,82,13,0.17, 36.9,"2,713",±75,"2,723",±100,"2,717",±76,"2,688  ",±16  ,"2,491",±140,-1 ,1.907,3.4,0.1859 ,0.91,1.911,3.4,0.1839 ,0.99,13.27,3.5,0.523,3.4,.960,1.908,3.4,0.1855 ,0.92,13.40,3.5,0.524,3.4,.965
09jaa-0046-6 ,0.18,83,42,0.53, 37.7,"2,741",±72,"2,766",±100,"2,746",±77,"2,682  ",±15  ,"2,662",± 98,-2 ,1.883,3.2,0.1848 ,0.84,1.887,3.2,0.1831 ,0.92,13.38,3.4,0.530,3.2,.962,1.883,3.2,0.1848 ,0.84,13.53,3.4,0.531,3.2,.968
09jaa-0046-7 ,0.12,96,45,0.49, 43.9,"2,743",±71,"2,763",±100,"2,747",±74,"2,695  ",±12  ,"2,670",± 90,-2 ,1.883,3.2,0.1857 ,0.74,1.885,3.2,0.1847 ,0.75,13.51,3.3,0.530,3.2,.973,1.882,3.2,0.1860 ,0.74,13.63,3.3,0.531,3.2,.974
09jaa-0046-8 ,0.08,157,165,1.08, 74.7,"2,833",±74,"2,907",±120,"2,834",±85,"2,673  ",±10  ,"2,824",±110,-6 ,1.810,3.2,0.1829 ,0.58,1.812,3.2,0.1821 ,0.61,13.86,3.3,0.552,3.2,.983,1.811,3.2,0.1826 ,0.58,13.90,3.3,0.552,3.2,.984
09jaa-0046-9c ,0.09,138,76,0.57, 62.4,"2,724",±70,"2,743",± 99,"2,726",±74,"2,678  ",±11  ,"2,692",± 90,-2 ,1.900,3.1,0.1835 ,0.65,1.901,3.1,0.1827 ,0.68,13.25,3.2,0.526,3.1,.978,1.900,3.1,0.1835 ,0.65,13.32,3.2,0.526,3.1,.979
09jaa-0046-10c ,0.09,132,60,0.47, 60.4,"2,746",±70,"2,773",±100,"2,749",±74,"2,680  ",±11  ,"2,685",± 94,-2 ,1.881,3.1,0.1838 ,0.65,1.883,3.1,0.1830 ,0.69,13.40,3.2,0.531,3.1,.977,1.880,3.1,0.1841 ,0.65,13.50,3.2,0.532,3.1,.979
"   Errors are 1-sigma; Pbc and Pb* indicate the common and radiogenic portions, respectively.",,,,,,,,,,,,,,,,,,,,,,,,,,,,,,,,,,,,,,
   Error in Standard calibration was 0.79%( not included in above errors but required when comparing data from different mounts).,,,,,,,,,,,,,,,,,,,,,,,,,,,,,,,,,,,,,,
   (1) Common Pb corrected using measured 204Pb.,,,,,,,,,,,,,,,,,,,,,,,,,,,,,,,,,,,,,,
   (2) Common Pb corrected by assuming 206Pb/238U-207Pb/235U age-concordance,,,,,,,,,,,,,,,,,,,,,,,,,,,,,,,,,,,,,,
   (3) Common Pb corrected by assuming 206Pb/238U-208Pb/232Th age-concordance,,,,,,,,,,,,,,,,,,,,,,,,,,,,,,,,,,,,,,
